# Supplementary material
Source: PubMed Central journal article supplement (PMC6649819)
Supplement: pkz007_supp.pdf [file pkz007_supp.pdf]

Supplementary Table 1: Registries included in each subregion and volume

| <b>Region</b>             | <b>1988-1992</b>        | <b>1993-1997</b>        | <b>1998-2002</b>        | <b>2003-2007</b>                 | <b>2008-2012</b>                 |
|---------------------------|-------------------------|-------------------------|-------------------------|----------------------------------|----------------------------------|
| <b>Northern Africa</b>    | Algeria, Sétif          | Algeria, Algiers        | Algeria, Sétif          | Algeria, Sétif                   | Algeria, Sétif                   |
|                           |                         |                         | Egypt, Gharbiah         | Libya, Benghazi                  | Algeria, Batna                   |
|                           |                         |                         | Tunisia, Centre, Sousse | Egypt, Gharbiah                  |                                  |
|                           |                         |                         |                         | Tunisia, North                   |                                  |
| <b>Sub-Saharan Africa</b> | France, La Reunion      | The Gambia              | Zimbabwe, Harare        | Malawi, Blantyre                 | Kenya, Nairobi                   |
|                           | Mali, Bamako            | France, La Reunion      | Uganda, Kyadondo County | South Africa, PROMEC             | Seychelles                       |
|                           | Uganda, Kyadondo County | Mali, Bamako            |                         | Uganda, Kyadondo County          | South Africa, Eastern Cape       |
|                           | Zimbabwe, Harare        | Uganda, Kyadondo County |                         | Zimbabwe, Harare                 | Uganda, Kyadondo County          |
|                           |                         | Zimbabwe, Harare        |                         |                                  | Zimbabwe, Harare                 |
| <b>Caribbean</b>          |                         | Cuba, Villa Clara       | France, La Martinique   | Cuba, Villa Clara                | France, Martinique               |
|                           |                         | France, Martinique      |                         | France, Martinique               | Jamaica, Kingston and St. Andrew |
|                           |                         | USA, Puerto Rico        |                         | Jamaica, Kingston and St. Andrew | USA, Puerto Rico                 |
|                           |                         |                         |                         | USA, Puerto Rico                 |                                  |
| <b>Central America</b>    | Costa Rica              | Costa Rica              | Costa Rica              | Costa Rica                       | Costa Rica                       |
| <b>South America</b>      | Argentina, Concordia    | Argentina, Bahía Blanca | Argentina, Bahía Blanca | Argentina, Bahía Blanca          | Argentina, Chaco                 |
|                           | Brazil, Belem           | Argentina, Concordia    | Brazil, Brasilia        | Argentina, Córdoba               | Argentina, Entre Rios Province   |
|                           | Brazil, Goiânia         | Brazil, Goiânia         | Brazil, Cuiabá          | Argentina, Mendoza               | Argentina, Córdoba               |
|                           | Brazil, Porto Alegre    | Colombia, Cali          | Brazil, Goiânia         | Argentina, Tierra del Fuego      | Argentina, Mendoza               |
|                           | Colombia, Cali          | Ecuador, Quito          | Brazil, São Paulo       | Brazil, Fortaleza                | Argentina, Tierra del Fuego      |
|                           | Ecuador, Quito          | Uruguay, Montevideo     | Chile, Valdivia         | Brazil, Goiânia                  | Brazil, Aracaju                  |
|                           | Peru, Lima              |                         | Colombia, Cali          | Brazil, São Paulo                | Brazil, Curitiba                 |
|                           | Peru, Trujillo          |                         | Ecuador, Quito          | Brazil, Cuiabá                   | Brazil, Florianopolis            |

|                          |                        |           |                |                                 |                                         |
|--------------------------|------------------------|-----------|----------------|---------------------------------|-----------------------------------------|
|                          | Uruguay,<br>Montevideo |           | Peru, Trujillo | Brazil, Aracaju                 | Brazil, Goiânia                         |
|                          |                        |           |                | Brazil, Belo Horizonte          | Brazil, Jau                             |
|                          |                        |           |                | Chile, Valdivia                 | Brazil, Pocos de Caldas                 |
|                          |                        |           |                | Chile, Bío Bío Province         | Chile, Region of<br>Antofagasta         |
|                          |                        |           |                | Chile, Region of<br>Antofagasta | Chile, Bío Bío<br>Province              |
|                          |                        |           |                | Colombia, Cali                  | Chile, Concepcion                       |
|                          |                        |           |                | Colombia, Bucaramanga           | Chile, Valdivia                         |
|                          |                        |           |                | Colombia, Manizales             | Colombia, Cali                          |
|                          |                        |           |                | Colombia, Pasto                 | Colombia,<br>Bucaramanga                |
|                          |                        |           |                | Ecuador, Quito                  | Colombia, Manizales                     |
|                          |                        |           |                | Brazil, Belo Horizonte          | Colombia, Pasto                         |
|                          |                        |           |                | Ecuador, Cuenca                 | Ecuador, Cuenca                         |
|                          |                        |           |                | Uruguay                         | Argentina, Chaco                        |
|                          |                        |           |                |                                 | Ecuador, Guayaquil                      |
|                          |                        |           |                |                                 | Ecuador, Loja                           |
|                          |                        |           |                |                                 | Ecuador, Manabi                         |
|                          |                        |           |                |                                 | Ecuador, Quito                          |
|                          |                        |           |                |                                 | French Guiana                           |
|                          |                        |           |                |                                 | Peru, Lima                              |
|                          |                        |           |                |                                 | Uruguay                                 |
| <b>North<br/>America</b> | USA, SEER              | USA, SEER | USA, SEER      | USA, SEER                       | USA, SEER                               |
|                          |                        |           |                |                                 | Canada, Alberta                         |
|                          |                        |           |                |                                 | Canada, British<br>Columbia             |
|                          |                        |           |                |                                 | Canada, Manitoba                        |
|                          |                        |           |                |                                 | Canada, New<br>Brunswick                |
|                          |                        |           |                |                                 | Canada,<br>Newfoundland and<br>Labrador |
|                          |                        |           |                |                                 | Canada, Northwest<br>Territories        |

|                     |                            |                            |                                      |                                      |                                      |
|---------------------|----------------------------|----------------------------|--------------------------------------|--------------------------------------|--------------------------------------|
|                     |                            |                            |                                      |                                      | Canada, Nova Scotia                  |
|                     |                            |                            |                                      |                                      | Canada, Nunavut                      |
|                     |                            |                            |                                      |                                      | Canada, Ontario                      |
|                     |                            |                            |                                      |                                      | Canada, Prince Edward Island         |
|                     |                            |                            |                                      |                                      | Canada, Saskatchewan                 |
|                     |                            |                            |                                      |                                      | Canada, Yukon                        |
| <b>Eastern Asia</b> | China, Hong Kong           | China, Beijing             | China, Guangzhou City                | China, Beijing City                  | China, Anshan City                   |
|                     | China, Qidong County       | China, Changle             | China, Hong Kong                     | China, Qidong County                 | China, Beijing                       |
|                     | China, Shanghai            | China, Cixian              | China, Jiashan                       | China, Shanghai City                 | China, Benxi                         |
|                     | China, Tianjin             | China, Hong Kong           | China, Nangang District, Harbin City | China, Cixian County                 | China, Cixian County                 |
|                     | Japan, Hiroshima           | China, Jiashan             | China, Shanghai                      | China, Jiashan County                | China, Guangzhou                     |
|                     | Japan, Miyagi Prefecture   | China, Qidong County       | China, Zhongshan                     | China, Wuhan City                    | China, Guanyun                       |
|                     | Japan, Nagasaki Prefecture | China, Shanghai            | Japan, Aichi Prefecture              | China, Zhongshan City                | China, Haimen County                 |
|                     | Japan, Osaka Prefecture    | China, Taiwan              | Japan, Fukui Prefecture              | China, Harbin City, Nangang District | China, Hangzhou City                 |
|                     | Japan, Saga Prefecture     | China, Tianjin             | Japan, Hiroshima                     | China, Yanting County                | China, Harbin City, Nangang District |
|                     | Japan, Yamagata Prefecture | China, Wuhan               | Japan, Miyagi Prefecture             | China, Haining County                | China, Hefei                         |
|                     | Korea, Kangwha County      | Japan, Hiroshima           | Japan, Nagasaki Prefecture           | China, Jiaxing City                  | China, Hengdong                      |
|                     |                            | Japan, Miyagi Prefecture   | Japan, Osaka Prefecture              | China, Hong Kong                     | China, Hong Kong                     |
|                     |                            | Japan, Nagasaki Prefecture | Japan, Yamagata Prefecture           | China, Yangcheng County              | China, Huaiyin District, Huai'an     |
|                     |                            | Japan, Osaka Prefecture    | Korea                                | China, Macao                         | China, Jiangmen                      |
|                     |                            | Japan, Saga Prefecture     |                                      | Japan, Hiroshima                     | China, Jianhu County                 |
|                     |                            | Japan, Yamagata Prefecture |                                      | Japan, Miyagi Prefecture             | China, Jiashan County                |

|  |                       |                            |                             |
|--|-----------------------|----------------------------|-----------------------------|
|  |                       | Japan, Nagasaki Prefecture | China, Jiaxing City         |
|  | Korea, Busan          |                            |                             |
|  | Korea, Daegu          | Japan, Osaka Prefecture    | China, Lianyungang          |
|  | Korea, Kangwha County | Japan, Saga Prefecture     | China, Linzhou County       |
|  | Korea, Seoul          | Japan, Niigata Prefecture  | China, Liuzhou              |
|  |                       | Japan, Fukui Prefecture    | China, Maanshan             |
|  |                       | Japan, Aichi Prefecture    | China, Qidong County        |
|  |                       | Republic of Korea)         | China, Shanghai City        |
|  |                       |                            | China, Shenyang             |
|  |                       |                            | China, Shexian County       |
|  |                       |                            | China, Sheyang              |
|  |                       |                            | China, Tongling City        |
|  |                       |                            | China, Wuhan City           |
|  |                       |                            | China, Wuxi                 |
|  |                       |                            | China, Xianju               |
|  |                       |                            | China, Xiping               |
|  |                       |                            | China, Yanshi               |
|  |                       |                            | China, Yanting County       |
|  |                       |                            | China, Yueyanglou           |
|  |                       |                            | China, Zhongshan City       |
|  |                       |                            | China, Zhuhai               |
|  |                       |                            | Japan, Aichi Prefecture     |
|  |                       |                            | Japan, Fukui Prefecture     |
|  |                       |                            | Japan, Hiroshima Prefecture |
|  |                       |                            | Japan, Miyagi Prefecture    |

|                           |                         |                            |                         |                                  |                                  |
|---------------------------|-------------------------|----------------------------|-------------------------|----------------------------------|----------------------------------|
|                           |                         |                            |                         |                                  | Japan, Nagasaki Prefecture       |
|                           |                         |                            |                         |                                  | Japan, Niigata Prefecture        |
|                           |                         |                            |                         |                                  | Japan, Osaka Prefecture          |
|                           |                         |                            |                         |                                  | Japan, Tochigi Prefecture        |
|                           |                         |                            |                         |                                  | Japan, Yamagata Prefecture       |
|                           |                         |                            |                         |                                  | Republic of Korea                |
| <b>South-eastern Asia</b> | Philippines, Manila     | Philippines, Manila        | Malaysia, Penang        | Malaysia, Penang                 | Brunei Darussalam                |
|                           | Singapore               | Philippines, Rizal         | Malaysia, Sarawak       | Philippines, Manila              | Malaysia, Penang                 |
|                           | Thailand, Chiang Mai    | Singapore                  | Philippines, Manila     | Philippines, Rizal               | Philippines, Manila              |
|                           | Thailand, Khon Kaen     | Thailand, Bangkok          | Singapore               | Singapore                        | Philippines, Rizal               |
|                           | Viet Nam, Hanoi         | Thailand, Chiang Mai       | Thailand, Chiang Mai    | Thailand, Chiang Mai             | Thailand, Bangkok                |
|                           |                         | Thailand, Khon Kaen        | Thailand, Lampang       | Thailand, Khon Kaen              | Thailand, Chiang Mai             |
|                           |                         | Thailand, Lampang          | Thailand, Songkhla      | Thailand, Bangkok                | Thailand, Chonburi               |
|                           |                         | Thailand, Songkhla         |                         | Thailand, Songkhla               | Thailand, Khon Kaen              |
|                           |                         | Viet Nam, Hanoi            |                         | Thailand, Lampang                | Thailand, Lampang                |
|                           |                         | Viet Nam, Ho Chi Minh City |                         | Thailand, Chonburi               | Thailand, Lopburi Province       |
|                           |                         |                            |                         |                                  | Thailand, Songkhla               |
|                           |                         |                            |                         |                                  | Viet Nam, Ho Chi Minh City       |
| <b>Southern Asia</b>      | India, Bangalore        | India, Ahmedabad           | India, Chennai (Madras) | India, Bangalore                 | India, Ahmedabad                 |
|                           | India, Barshi           | India, Bangalore           | India, New Delhi        | India, Mumbai                    | India, Bangalore                 |
|                           | India, Mumbai (Bombay)  | India, Chennai (Madras)    | India, Karunagappally   | India, Chennai                   | India; Barshi, Paranda, and Bhum |
|                           | India, Karunagappally   | India, Delhi               | India, Mumbai (Bombay)  | India, Poona                     | India, Bhopal                    |
|                           | India, Chennai (Madras) | India, Karunagappally      | India, Nagpur           | India, Barshi, Paranda, and Bhum | India, Cachar                    |

|                     |                   |                            |                         |                                                  |                                                  |
|---------------------|-------------------|----------------------------|-------------------------|--------------------------------------------------|--------------------------------------------------|
|                     | India, Trivandrum | India, Mumbai<br>(Bombay)  | India, Poona            | India, Trivandrum                                | India, Chennai                                   |
|                     |                   | India, Nagpur              | India, Trivandrum       | India, Karunagappally                            | India, Dindigul,<br>Ambilikkai                   |
|                     |                   | India, Poona               |                         | India, New Delhi                                 | India, Kamrup Urban<br>District                  |
|                     |                   | India, Trivandrum          |                         | India, Dindigul,<br>Ambilikkai                   | India, Kollam                                    |
|                     |                   |                            |                         | India, Bhopal                                    | India, Mizoram                                   |
|                     |                   |                            |                         | India, Sikkim State                              | India, Mumbai                                    |
|                     |                   |                            |                         | India, Mizoram                                   | India, Poona                                     |
|                     |                   |                            |                         | Iran (Islamic Republic<br>of), Golestan Province | India, Sikkim State                              |
|                     |                   |                            |                         |                                                  | India, Tripura                                   |
|                     |                   |                            |                         |                                                  | India, Trivandrum                                |
|                     |                   |                            |                         |                                                  | India, Wardha                                    |
|                     |                   |                            |                         |                                                  | Iran (Islamic Republic<br>of), Golestan Province |
| <b>Western Asia</b> | Israel            | Israel                     | Bahrain: Bahraini       | Bahrain: Bahraini                                | Bahrain: Bahraini                                |
|                     | Kuwait            | Kuwait                     | Cyprus                  | Cyprus                                           | Cyprus                                           |
|                     |                   | Oman: Omani                | Israel                  | Israel                                           | Israel                                           |
|                     |                   | Pakistan, South<br>Karachi | Kuwait: Kuwaitis        | Kuwait                                           | Turkey, Antalya                                  |
|                     |                   |                            | Kuwait: Non-Kuwaitis    | Turkey, Izmir                                    | Turkey, Bursa                                    |
|                     |                   |                            | Oman: Omani             | Turkey, Antalya                                  | Turkey, Edirne                                   |
|                     |                   |                            | Pakistan, South Karachi | Turkey, Edirne                                   | Turkey, Erzurum                                  |
|                     |                   |                            | Turkey, Antalya         | Turkey, Trabzon                                  | Turkey, Eskisehir                                |
|                     |                   |                            | Turkey, Izmir           | Qatar: Qatari                                    | Turkey, Izmir                                    |
|                     |                   |                            |                         | Saudi Arabia, Riyadh:<br>Saudi                   | Turkey, Samsun                                   |
|                     |                   |                            |                         |                                                  | Turkey, Trabzon                                  |
|                     |                   |                            |                         |                                                  | Kuwait                                           |
|                     |                   |                            |                         |                                                  | Jordan: Jordanians                               |
|                     |                   |                            |                         |                                                  | Qatar: Qatari                                    |

|                        |                          |                       |                               |                                         |                                    |
|------------------------|--------------------------|-----------------------|-------------------------------|-----------------------------------------|------------------------------------|
|                        |                          |                       |                               |                                         | Saudi Arabia, Riyadh:<br>Saudi     |
| <b>Eastern Europe</b>  | Belarus                  | Belarus               | Belarus                       | Belarus                                 | Belarus                            |
|                        | Czech Republic           | Czech Republic        | Bulgaria                      | Bulgaria                                | Bulgaria                           |
|                        | Poland, Cracow           | Poland, Cracow        | Czech Republic                | Czech Republic                          | Czech Republic                     |
|                        | Poland, Kielce           | Poland, Kielce        | Poland, Cracow                | Poland, Cracow                          | Poland, Kielce                     |
|                        | Poland, Lower Silesia    | Poland, Lower Silesia | Poland, Kielce                | Poland, Lower Silesia)                  | Poland, Lower Silesia              |
|                        | Poland, Warsaw city      | Poland, Warsaw city   | Poland, Warsaw City           | Poland, Kielce                          | Poland, Lublin                     |
|                        | Slovakia                 | Russia, St Petersburg | Russia, St Petersburg         | Poland, Podkarpackie                    | Poland, Podkarpackie               |
|                        |                          | Slovakia              | Slovak Republic               | Russian Federation,<br>Saint Petersburg | Poland, Poznan                     |
|                        |                          |                       |                               | Slovakia                                | Russian Federation,<br>Arkhangelsk |
|                        |                          |                       |                               | Ukraine                                 | Russian Federation,<br>Chelyabinsk |
|                        |                          |                       |                               |                                         | Russian Federation,<br>Karelia     |
|                        |                          |                       |                               |                                         | Russian Federation,<br>Samara      |
|                        |                          |                       |                               |                                         | Slovakia                           |
|                        |                          |                       |                               |                                         | Ukraine                            |
| <b>Northern Europe</b> | Denmark                  | Denmark               | Denmark                       | Denmark                                 | Denmark                            |
|                        | Estonia                  | Estonia               | Estonia                       | Estonia                                 | Estonia                            |
|                        | Finland                  | Finland               | Finland                       | Finland                                 | Iceland                            |
|                        | Iceland                  | Iceland               | Iceland                       | Iceland                                 | Ireland                            |
|                        | Ireland, Southern        | Ireland               | Ireland                       | Ireland                                 | Latvia                             |
|                        | Latvia                   | Latvia                | Latvia                        | Latvia                                  | Lithuania                          |
|                        | Norway                   | Lithuania             | Lithuania                     | Lithuania                               | Norway                             |
|                        | Sweden                   | Norway                | Norway                        | Norway                                  | United Kingdom                     |
|                        | UK, England and<br>Wales | Sweden                | Sweden                        | Sweden                                  |                                    |
|                        | UK, Scotland             | UK, England           | UK, East of England<br>Region | UK, England                             |                                    |

|                            |                             |                                            |                                                  |                                 |
|----------------------------|-----------------------------|--------------------------------------------|--------------------------------------------------|---------------------------------|
|                            |                             | UK, England,<br>Merseyside and<br>Cheshire | UK, Scotland                                     |                                 |
|                            | UK, Northern Ireland        |                                            |                                                  |                                 |
|                            | UK, Scotland                | UK, England, North<br>Western              | UK, Northern Ireland                             |                                 |
|                            |                             | UK, England, Northern<br>and Yorkshire     | UK, Wales                                        |                                 |
|                            |                             | UK, England, Oxford<br>Region              |                                                  |                                 |
|                            |                             | UK, England, South and<br>Western Regions  |                                                  |                                 |
|                            |                             | UK, England, Thames                        |                                                  |                                 |
|                            |                             | UK, England, Trent                         |                                                  |                                 |
|                            |                             | UK, England, West<br>Midlands              |                                                  |                                 |
|                            |                             | UK, Northern Ireland                       |                                                  |                                 |
|                            |                             | UK, Scotland                               |                                                  |                                 |
| <b>Southern<br/>Europe</b> | Croatia                     | Croatia                                    | Croatia                                          | Croatia                         |
|                            | Italy, Ferrara<br>Province  | Italy, Biella Province                     | Italy, Biella Province                           | Italy, Florence and Prato       |
|                            | Italy, Florence             | Italy, Ferrara Province                    | Italy, Brescia Province                          | Italy, Latina                   |
|                            | Italy, Genoa City           | Italy, Florence                            | Italy, Ferrara Province                          | Italy, Varese                   |
|                            | Italy, Latina Province      | Italy, Genoa Province                      | Italy, Florence and Prato                        | Italy, Parma                    |
|                            | Italy, Macerata<br>Province | Italy, Liguria                             | Italy, Genoa Province                            | Italy, Ragusa                   |
|                            | Italy, Modena               | Italy, Macerata<br>Province                | Italy, Macerata Province                         | Italy, Romagna                  |
|                            | Italy, Parma Province       | Italy, Modena<br>Province                  | Italy, Milan                                     | Italy, Turin                    |
|                            | Italy, Ragusa               | Italy, North East                          | Italy, Modena Province                           | Italy, Modena                   |
|                            | Italy, Romagna              | Italy, Parma Province                      | Italy, Naples                                    | Italy, Ferrara                  |
|                            | Italy, Torino               | Italy, Ragusa Province                     | Italy, North East Cancer<br>Surveillance Network | Italy, Veneto                   |
|                            | Italy, Trieste              | Italy, Romagna                             | Italy, Parma Province                            | Italy, Umbria                   |
|                            |                             |                                            |                                                  | Italy, Friuli-Venezia<br>Giulia |



|                        |                             |                               |                              |                                 |
|------------------------|-----------------------------|-------------------------------|------------------------------|---------------------------------|
| Italy, Varese Province | Italy, Sassari              | Italy, Ragusa Province        | Italy, Sassari               | Italy, Latina                   |
| Italy, Venetian Region | Italy, Torino               | Italy, Reggio Emilia Province | Italy, Naples                | Italy, Lecco                    |
| Malta                  | Italy, Umbria               | Italy, Romagna Region         | Italy, Biella                | Italy, Lombardy, South, Pavia   |
| Slovenia               | Italy, Varese Province      | Italy, Salerno Province       | Italy, Friuli-Venezia Giulia | Italy, Mantua                   |
| Spain, Albacete        | Italy, Venetian Region      | Italy, Sassari Province       | Italy, Trento                | Italy, Milan                    |
| Spain, Asturias        | Malta                       | Italy, Syracuse Province      | Italy, Mantua                | Italy, Modena                   |
| Spain, Basque Country  | Portugal, Vila Nova de Gaia | Italy, Sondrio                | Italy, Genoa                 | Italy, Monza                    |
| Spain, Granada         | Slovenia                    | Italy, Torino                 | Italy, Reggio Emilia         | Italy, Naples                   |
| Spain, Mallorca        | Spain, Albacete             | Italy, Umbria Region          | Italy, Brescia               | Italy, Nuoro                    |
| Spain, Murcia          | Spain, Asturias             | Italy, Varese Province        | Italy, Milan                 | Italy, Palermo                  |
| Spain, Navarra         | Spain, Canary Islands       | Italy, Veneto Region          | Italy, Salerno               | Italy, Parma                    |
| Spain, Tarragona       | Spain, Cuenca               | Malta                         | Italy, Sondrio               | Italy, Piacenza                 |
| Spain, Zaragoza        | Spain, Girona               | Portugal, Porto               | Italy, Syracuse              | Italy, Ragusa and Caltanissetta |
| Yugoslavia, Vojvodina  | Spain, Granada              | Portugal, South Regional      | Italy, Trapani               | Italy, Reggio Emilia            |
|                        | Spain, Mallorca             | Serbia                        | Italy, Nuoro                 | Italy, Romagna                  |
|                        | Spain, Murcia               | Slovenia                      | Italy, Catanzaro             | Italy, Sassari                  |
|                        | Spain, Navarra              | Spain, Albacete               | Italy, Palermo               | Italy, Sondrio                  |
|                        | Spain, Tarragona            | Spain, Asturias               | Italy, South Tyrol           | Italy, South Tyrol              |
|                        | Spain, Zaragoza             | Spain, Basque Country         | Italy, Catania and Messina   | Italy, Syracuse                 |
|                        | Yugoslavia, Vojvodina       | Spain, Canary Islands         | Italy, Como                  | Italy, Taranto                  |
|                        |                             | Spain, Cuenca                 | Italy, Lecco                 | Italy, Trento                   |
|                        |                             | Spain, Girona                 | Italy, Lombardy, South       | Italy, Turin                    |
|                        |                             | Spain, Granada                | Malta                        | Italy, Umbria                   |
|                        |                             | Spain, Murcia                 | Portugal, Azores             | Italy, Varese                   |
|                        |                             | Spain, Navarra                | Serbia, Central              | Italy, Veneto                   |
|                        |                             | Spain, Tarragona              | Slovenia                     | Malta                           |
|                        |                             | Spain, Zaragoza               | Spain, Tarragona             | Portugal, Azores                |

|                       |                         |                     |                          |                          |                          |
|-----------------------|-------------------------|---------------------|--------------------------|--------------------------|--------------------------|
|                       |                         |                     |                          | Spain, Granada           | Slovenia                 |
|                       |                         |                     |                          | Spain, Murcia            | Spain, Albacete          |
|                       |                         |                     |                          | Spain, Navarra           | Spain, Asturias          |
|                       |                         |                     |                          |                          | Spain, Basque Country    |
|                       |                         |                     |                          | Spain, Asturias          |                          |
|                       |                         |                     |                          | Spain, Basque Country    | Spain, Canary Islands    |
|                       |                         |                     |                          | Spain, Mallorca          | Spain, Castellón         |
|                       |                         |                     |                          | Spain, Albacete          | Spain, Ciudad Real       |
|                       |                         |                     |                          | Spain, Girona            | Spain, Cuenca            |
|                       |                         |                     |                          | Spain, Canary Islands    | Spain, Girona            |
|                       |                         |                     |                          | Spain, Cuenca            | Spain, Granada           |
|                       |                         |                     |                          | Spain, La Rioja          | Spain, La Rioja          |
|                       |                         |                     |                          | Spain, Ciudad Real       | Spain, Mallorca          |
|                       |                         |                     |                          |                          | Spain, Murcia            |
|                       |                         |                     |                          |                          | Spain, Navarra           |
|                       |                         |                     |                          |                          | Spain, Tarragona         |
| <b>Western Europe</b> | Austria, Tyrol          | Austria, Tyrol      | Austria                  | Austria                  | Austria                  |
|                       | France, Bas-Rhin        | Austria, Vorarlberg | Belgium, Antwerp         | Belgium                  | Belgium                  |
|                       |                         | Belgium, Flanders   |                          |                          |                          |
|                       | France, Calvados        | (excl. Limburg)     | Belgium, Flanders        | France, Bas-Rhin         | France, Bas-Rhin         |
|                       | France, Doubs           | Belgium, Limburg    | France, Bas-Rhin         | France, Calvados         | France, Calvados         |
|                       | France, Haut-Rhin       | France, Bas-Rhin    | France, Calvados         | France, Doubs            | France, Doubs            |
|                       | France, Hérault         | France, Calvados    | France, Doubs            | France, Haut-Rhin        | France, Gironde          |
|                       | France, Isère           | France, Cote d'Or   | France, Haut-Rhin        | France, Isère            | France, Haut-Rhin        |
|                       | France, Somme           | France, Doubs       | France, Hérault          | France, Somme            | France, Hérault          |
|                       | France, Tarn            | France, Haut-Rhin   | France, Isère            | France, Tarn             | France, Isère            |
|                       | Germany, Eastern States | France, Hérault     | France, Loire-Atlantique | France, Hérault          | France, Lille-Métropole  |
|                       | Germany, Saarland       | France, Isère       | France, Manche           | France, Loire-Atlantique | France, Limousin         |
|                       |                         |                     |                          |                          | France, Loire-Atlantique |
|                       | The Netherlands         | France, Manche      | France, Somme            | France, Manche           |                          |
|                       | Switzerland, Basel      | France, Somme       | France, Tarn             | France, Vendée           | France, Manche           |
|                       | Switzerland, Geneva     | France, Tarn        | France, Vendée           | Germany, Hamburg         | France, Somme            |
|                       | Switzerland, Graubünden | Germany, Saarland   | Germany, Brandenburg     | Germany, Munich          | France, Tarn             |

|                                |                                |                                         |                                        |                                    |
|--------------------------------|--------------------------------|-----------------------------------------|----------------------------------------|------------------------------------|
| Switzerland, Neuchâtel         | The Netherlands                | Germany, Free State of Saxony           | Germany, North Rhine-Westphalia        | France, Territoire de Belfort      |
| Switzerland, St Gall-Appenzell | Switzerland, Basel             | Germany, Hamburg                        | Germany, Bremen                        | France, Vendée                     |
| Switzerland, Valais            | Switzerland, Geneva            | Germany, Mecklenburg-Western Pomerania  | Germany, Schleswig-Holstein            | Germany, Bavaria                   |
| Switzerland, Vaud              | Graubünden and Glarus          | Germany, Munich                         | Germany, Brandenburg                   | Germany, Bremen                    |
| Switzerland, Zurich            | Switzerland, Neuchâtel         | Germany, Northrhine-Westphalia: Munster | Germany, Mecklenburg-Western Pomerania | Germany, Hamburg                   |
|                                | Switzerland, St Gall-Appenzell | Germany, Saarland                       | Germany, Free State of Saxony          | Germany, Lower Saxony              |
|                                | Switzerland, Ticino            | The Netherlands                         | Germany, Saarland                      | Germany, Munich                    |
|                                | Switzerland, Valais            | Switzerland, Geneva                     | The Netherlands                        | Germany, North Rhine-Westphalia    |
|                                | Switzerland, Vaud              | Switzerland, Graubünden and Glarus      | Switzerland, Basel                     | Germany, Rhineland-Palatinate      |
|                                | Switzerland, Zurich            | Switzerland, Neuchâtel                  | Switzerland, Geneva                    | Germany, Saarland                  |
|                                |                                | Switzerland, St Gall-Appenzell          | Switzerland, Neuchâtel                 | Germany, Schleswig-Holstein        |
|                                |                                | Switzerland, Ticino                     | Switzerland, St Gall-Appenzell         | The Netherlands                    |
|                                |                                | Switzerland, Valais                     | Switzerland, Vaud                      | Switzerland, Fribourg              |
|                                |                                | Switzerland, Vaud                       | Switzerland, Zurich                    | Switzerland, Geneva                |
|                                |                                |                                         |                                        | Switzerland, Graubünden and Glarus |
|                                |                                |                                         | Switzerland, Valais                    |                                    |
|                                |                                |                                         | Switzerland, Ticino                    | Switzerland, Neuchâtel             |
|                                |                                |                                         | Switzerland, Graubünden and Glarus     | Switzerland, St Gall-Appenzell     |
|                                |                                |                                         |                                        | Switzerland, Ticino                |
|                                |                                |                                         |                                        | Switzerland, Valais                |
|                                |                                |                                         |                                        | Switzerland, Vaud                  |
|                                |                                |                                         |                                        | Switzerland, Zurich                |

|                |                            |                               |                               |                               |               |
|----------------|----------------------------|-------------------------------|-------------------------------|-------------------------------|---------------|
| <b>Oceania</b> | Australia, New South Wales | Australia, Capital Territory  | Australia, New South Wales    | Australia, New South Wales    | Australia     |
|                | Australia, South           | Australia, New South Wales    | Australia, Northern Territory | Australia, Queensland         | New Caledonia |
|                | Australia, Tasmania        | Australia, Northern Territory | Australia, Queensland         | South Australia               | New Zealand   |
|                | Australia, Victoria        | Australia, Queensland         | Australia, South              | Australia, Tasmania           |               |
|                | Australia, Western         | Australia, South              | Australia, Tasmania           | Australia, Victoria           |               |
|                | France, French Polynesia   | Australia, Tasmania           | Australia, Victoria           | Western Australia             |               |
|                | New Zealand                | Australia, Victoria           | Australia, Western            | Australia, Northern Territory |               |
|                |                            | Australia, Western            | Australian Capital Territory  | New Zealand                   |               |
|                |                            | New Zealand                   | French Polynesia              |                               |               |
|                |                            |                               | New Zealand                   |                               |               |

Supplementary Table 2: Estimated average annual percent change (AAPC) and incidence (per million) of pediatric cancer by Human Development Index (HDI) level changes from 1990 to 2012

| Cancer                              | HDI Change**        | Year of Diagnosis |           |           |           |           | AAPC                        |
|-------------------------------------|---------------------|-------------------|-----------|-----------|-----------|-----------|-----------------------------|
|                                     |                     | 1988-1992         | 1993-1997 | 1998-2002 | 2003-2007 | 2008-2012 | (95% CI)                    |
| <b>Acute Lymphoblastic Leukemia</b> | Low to Medium       | 21.2              | 22.2      | 27.5      | 15.7      | 21.4      | -0.76 (-3.66, 2.23)         |
|                                     | Low/Medium to High  | 29.9              | 33.5      | 43.4      | 38.6      | 42.5      | <b>1.44 (0.24, 2.65)</b>    |
|                                     | Medium to Very High | 22.8              | 38.2      | 43.9      | 51.2      | 56.3      | <b>3.84 (2.28, 5.41)</b>    |
| <b>Acute Myeloid Leukemia</b>       | Low to Medium       | 4.4               | 4.6       | 3.5       | 4.9       | 4.5       | 0.33 (-1.52, 2.21)          |
|                                     | Low/Medium to High  | 8.1               | 6.9       | 9.5       | 8.2       | 9.5       | 1.01 (-0.39, 2.43)          |
|                                     | Medium to Very High | 3.4               | 4.7       | 5.0       | 6.9       | 8.1       | <b>4.29 (3.47, 5.11)</b>    |
| <b>Non-Hodgkin Lymphoma</b>         | Low to Medium       | 6.1               | 6.7       | 8.0       | 6.9       | 4.2       | -1.63 (-4.65, 1.49)         |
|                                     | Low/Medium to High  | 10.6              | 10.3      | 12.3      | 10.6      | 8.6       | -1.12 (-2.74, 0.53)         |
|                                     | Medium to Very High | 9.8               | 7.7       | 9.4       | 7.2       | 8.9       | -0.49 (-2.20, 1.25)         |
| <b>Ependymal Tumors</b>             | Low to Medium       | 0.6               | 0.6       | 0.8       | 1.1       | 1.1       | <b>3.87 (1.70, 6.09)</b>    |
|                                     | Low/Medium to High  | 0.7               | 1.0       | 3.1       | 2.0       | 2.5       | 4.13 (-1.29, 9.82)          |
|                                     | Medium to Very High | *                 | *         | 1.9       | 3.9       | 4.3       | <b>13.43 (4.39, 23.26)</b>  |
| <b>Astrocytic Tumors</b>            | Low to Medium       | 2.5               | 2.9       | 2.8       | 2.1       | 1.6       | <b>-2.74 (-4.91, -0.51)</b> |
|                                     | Low/Medium to High  | 2.7               | 3.9       | 3.9       | 3.6       | 3.1       | -0.17 (-2.10, 1.80)         |
|                                     | Medium to Very High | 3.4               | 2.4       | 3.3       | 4.6       | 6.0       | <b>3.93 (1.35, 6.56)</b>    |
| <b>Medulloblastoma</b>              | Low to Medium       | 3.4               | 1.9       | 2.7       | 2.8       | 1.8       | -1.36 (-4.87, 2.29)         |
|                                     | Low/Medium to High  | 1.8               | 2.8       | 2.5       | 2.7       | 3.8       | <b>3.12 (1.16, 5.12)</b>    |
|                                     | Medium to Very High | 3.6               | 2.4       | 5.4       | 6.4       | 6.8       | <b>4.36 (1.52, 7.27)</b>    |
| <b>Neuroblastoma</b>                | Low to Medium       | 4.6               | 6.5       | 5.1       | 4.7       | 2.7       | -3.08 (-6.12, 0.05)         |
|                                     | Low/Medium to High  | 1.9               | 4.7       | 11.4      | 8.1       | 7.6       | 3.14 (-2.82, 9.47)          |
|                                     | Medium to Very High | 2.2               | 2.6       | 5.7       | 7.4       | 10.5      | <b>8.26 (6.44, 10.11)</b>   |
| <b>Retinoblastoma</b>               | Low to Medium       | 9.1               | 10.6      | 7.6       | 8.7       | 6.6       | <b>-1.92 (-3.68, -0.14)</b> |
|                                     | Low/Medium to High  | 6.8               | 6.8       | 12.1      | 8.8       | 8.8       | 0.85 (-2.03, 3.82)          |
|                                     | Medium to Very High | 6.7               | 2.6       | 7.5       | 10.8      | 9.5       | 3.31 (-1.38, 8.23)          |
| <b>Kidney Tumors</b>                | Low to Medium       | 8.1               | 8.6       | 10.2      | 9.5       | 9.6       | 0.70 (-0.22, 1.63)          |
|                                     | Low/Medium to High  | 8.5               | 10.3      | 15.0      | 12.9      | 12.3      | 1.21 (-1.00, 3.46)          |
|                                     | Medium to Very High | 19.2              | 13.9      | 17.6      | 15.7      | 17.8      | -0.05 (-1.58, 1.50)         |

|                        |                     |     |     |     |     |     |                             |
|------------------------|---------------------|-----|-----|-----|-----|-----|-----------------------------|
| <b>Hepatoblastoma</b>  | Low to Medium       | 2.9 | 1.8 | 1.6 | 2.0 | 1.7 | -1.58 (-4.00, 0.90)         |
|                        | Low/Medium to High  | 0.8 | 1.8 | 2.2 | 2.9 | 3.9 | <b>6.64 (4.92, 8.38)</b>    |
|                        | Medium to Very High | 1.5 | *   | 2.3 | 3.7 | 5.2 | <b>9.35 (2.93, 16.16)</b>   |
| <b>Testicular Germ</b> | Low to Medium       | 2.2 | 2.4 | 2.1 | 1.9 | 1.3 | <b>-2.88 (-4.69, -1.05)</b> |
| <b>Cell Tumors</b>     | Low/Medium to High  | 3.7 | 2.9 | 2.2 | 3.8 | 4.0 | 1.42 (-1.49, 4.40)          |
|                        | Medium to Very High | *   | 1.3 | 2.9 | 3.0 | 2.8 | <b>5.45 (0.97, 10.12)</b>   |

\* Rates were not calculated for time periods with less than five cases.

\*\*4 countries moved from low to medium HDI, 17 countries moved from low or medium to high HDI, 5 countries moved from medium to very high HDI

AAPCs in bold are statistically significant

Supplementary Table 3: Incidence rates (per million) of acute lymphoblastic leukemia by region, sex, and year of diagnosis

| Region                    | Sex        | Year of Diagnosis |           |           |           |           | AAPC<br>(95% CI)     |
|---------------------------|------------|-------------------|-----------|-----------|-----------|-----------|----------------------|
|                           |            | 1988-1992         | 1993-1997 | 1998-2002 | 2003-2007 | 2008-2012 |                      |
| <b>Northern Africa</b>    | Male       | -                 | 15.5      | 31.3      | 18.1      | 17.3      | 0.53 (-6.26, 7.80)   |
|                           | Female     | -                 | 16.0      | 24.3      | 16.1      | 12.8      | 1.94 (-7.82, 12.74)  |
|                           | Both sexes | -                 | 15.8      | 27.9      | 17.1      | 15.1      | 1.13 (-6.35, 9.21)   |
| <b>Sub-Saharan Africa</b> | Male       | 6.5               | 5.8       | -         | -         | 6.9       | 0.21 (-9.79, 11.31)  |
|                           | Female     | 8.6               | -         | -         | -         | 6.5       | 0.36 (-8.36, 9.91)   |
|                           | Both sexes | 7.6               | 3.9       | 2.2       | 1.5       | 6.7       | 0.28 (-8.21, 9.57)   |
| <b>Caribbean</b>          | Male       | -                 | 19.5      | 53.3      | 31.1      | 48.3      | 4.83 (-1.64, 11.71)  |
|                           | Female     | -                 | 33.3      | -         | 24.9      | 50.4      | 4.01 (-5.01, 13.90)  |
|                           | Both sexes | -                 | 26.3      | 32.5      | 28.1      | 49.3      | 4.44 (-0.43, 9.55)   |
| <b>Central America</b>    | Male       | 67.9              | 70.0      | 66.0      | 61.5      | 95.4      | 1.14 (-1.04, 3.38)   |
|                           | Female     | 51.1              | 55.8      | 43.5      | 69.0      | 69.7      | 1.82 (-0.45, 4.14)   |
|                           | Both sexes | 59.6              | 63.1      | 55.0      | 65.2      | 82.9      | 1.44 (-0.20, 3.10)   |
| <b>South America</b>      | Male       | 33.8              | 50.7      | 50.5      | 42.6      | 54.6      | 1.51 (-0.54, 3.60)   |
|                           | Female     | 28.9              | 41.5      | 38.7      | 38.9      | 53.1      | 2.66 (0.89, 4.47)    |
|                           | Both sexes | 31.4              | 46.2      | 44.7      | 40.7      | 53.9      | 2.03 (0.18, 3.92)    |
| <b>North America</b>      | Male       | 64.2              | 62.4      | 69.3      | 71.3      | 48.8      | -0.93 (-3.07, 1.26)  |
|                           | Female     | 59.6              | 56.7      | 56.1      | 56.6      | 46.7      | -1.01 (-1.87, -0.13) |
|                           | Both sexes | 62.0              | 59.6      | 62.9      | 64.1      | 47.8      | -0.96 (-2.53, 0.62)  |
| <b>Eastern Asia</b>       | Male       | 33.6              | 34.5      | 38.8      | 45.8      | 42.3      | 1.37 (0.33, 2.41)    |
|                           | Female     | 29.0              | 29.3      | 32.4      | 39.0      | 33.6      | 1.01 (-0.35, 2.38)   |
|                           | Both sexes | 31.4              | 32.0      | 35.8      | 42.6      | 38.1      | 1.21 (0.04, 2.39)    |
| <b>South-eastern Asia</b> | Male       | 35.9              | 38.3      | 48.4      | 54.4      | 47.7      | 1.67 (0.11, 3.27)    |
|                           | Female     | 27.7              | 28.2      | 40.0      | 35.1      | 33.9      | 1.09 (-0.59, 2.81)   |
|                           | Both sexes | 32.0              | 33.4      | 44.3      | 45.1      | 41.0      | 1.44 (-0.05, 2.96)   |
| <b>Southern Asia</b>      | Male       | 27.4              | 27.3      | 32.1      | 16.0      | 25.1      | -1.43 (-4.88, 2.15)  |
|                           | Female     | 16.6              | 19.6      | 22.3      | 13.3      | 17.3      | -0.85 (-3.58, 1.96)  |
|                           | Both sexes | 22.0              | 23.6      | 27.5      | 14.7      | 21.3      | -1.18 (-4.30, 2.05)  |
| <b>Western Asia</b>       | Male       | 27.3              | 22.3      | 44.2      | 55.0      | 52.6      | 3.77 (0.92, 6.69)    |
|                           | Female     | 22.6              | 21.5      | 33.4      | 40.8      | 42.5      | 3.54 (1.93, 5.18)    |
|                           | Both sexes | 25.0              | 21.9      | 39.0      | 48.0      | 47.7      | 3.68 (1.37, 6.03)    |
| <b>Eastern Europe</b>     | Male       | 39.0              | 41.3      | 51.0      | 55.4      | 55.8      | 1.88 (1.13, 2.64)    |
|                           | Female     | 29.8              | 38.2      | 42.5      | 45.3      | 45.3      | 2.02 (1.25, 2.81)    |
|                           | Both sexes | 34.5              | 39.8      | 46.9      | 50.5      | 50.5      | 1.95 (1.29, 2.61)    |

|                        |            |      |      |      |      |      |                    |
|------------------------|------------|------|------|------|------|------|--------------------|
| <b>Northern Europe</b> | Male       | 55.7 | 61.3 | 59.9 | 62.5 | 62.9 | 0.48 (0.09, 0.87)  |
|                        | Female     | 53.3 | 52.4 | 54.3 | 56.1 | 53.8 | 0.19 (-0.14, 0.52) |
|                        | Both sexes | 54.5 | 56.9 | 57.2 | 59.4 | 58.4 | 0.35 (0.12, 0.57)  |
| <b>Southern Europe</b> | Male       | 54.9 | 58.5 | 63.5 | 60.2 | 61.0 | 0.37 (-0.23, 0.98) |
|                        | Female     | 41.5 | 46.2 | 54.4 | 51.9 | 52.4 | 0.97 (-0.01, 1.96) |
|                        | Both sexes | 48.4 | 52.5 | 59.1 | 56.1 | 56.8 | 0.64 (-0.13, 1.41) |
| <b>Western Europe</b>  | Male       | 41.9 | 58.2 | 55.8 | 63.1 | 61.4 | 1.38 (0.20, 2.58)  |
|                        | Female     | 43.7 | 45.7 | 45.6 | 59.0 | 55.7 | 1.47 (0.36, 2.59)  |
|                        | Both sexes | 42.8 | 52.1 | 50.9 | 61.1 | 58.6 | 1.42 (0.49, 2.37)  |
| <b>Oceania</b>         | Male       | 66.9 | 62.1 | 71.1 | 74.2 | 74.3 | 0.80 (0.16, 1.44)  |
|                        | Female     | 54.2 | 64.0 | 56.0 | 68.2 | 62.8 | 0.65 (-0.48, 1.78) |
|                        | Both sexes | 60.7 | 63.0 | 63.7 | 71.3 | 68.7 | 0.73 (0.27, 1.19)  |

\* Rates were not calculated for time periods with less than five cases.

- Denotes time periods without data.



Supplementary Table 4: Incidence rates (per million) of acute myeloid leukemia by region, sex, and year of diagnosis

| Region                    | Sex        | Year of Diagnosis |           |           |           |           | AAPC<br>(95% CI)      |
|---------------------------|------------|-------------------|-----------|-----------|-----------|-----------|-----------------------|
|                           |            | 1988-1992         | 1993-1997 | 1998-2002 | 2003-2007 | 2008-2012 |                       |
| <b>Northern Africa</b>    | Male       | *                 | *         | *         | 3.2       | *         | 2.54 (-5.91, 11.75)   |
|                           | Female     | *                 | *         | *         | 5.7       | *         | 1.94 (-4.09, 8.36)    |
|                           | Both sexes | *                 | *         | 2.3       | 4.4       | 4.4       | 2.18 (-2.67, 7.27)    |
| <b>Sub-Saharan Africa</b> | Male       | *                 | *         | 4.5       | *         | *         | -4.26 (-16.18, 9.36)  |
|                           | Female     | *                 | *         | *         | *         | *         | -2.45 (-10.16, 5.92)  |
|                           | Both sexes | 3.8               | *         | 3.1       | 1.5       | 1.2       | -3.49 (-12.01, 5.86)  |
| <b>Caribbean</b>          | Male       | -                 | *         | *         | *         | *         | -3.23 (-15.64, 11.00) |
|                           | Female     | -                 | *         | *         | *         | 8.6       | 9.06 (3.13, 15.32)    |
|                           | Both sexes | -                 | *         | *         | 3.7       | 6.3       | 2.28 (-7.67, 13.30)   |
| <b>Central America</b>    | Male       | 9.0               | *         | 12.8      | 9.5       | 11.1      | 1.03 (-1.49, 3.62)    |
|                           | Female     | 9.4               | 12.7      | 7.2       | 7.8       | *         | -2.35 (-4.67, 0.04)   |
|                           | Both sexes | 9.2               | 9.9       | 10.1      | 8.7       | 8.5       | -0.45 (-1.39, 0.49)   |
| <b>South America</b>      | Male       | 5.9               | 10.4      | 13.0      | 9.7       | 11.7      | 1.70 (-1.44, 4.95)    |
|                           | Female     | 6.6               | 7.9       | 8.5       | 9.5       | 9.5       | 1.62 (0.84, 2.39)     |
|                           | Both sexes | 6.3               | 9.2       | 10.8      | 9.6       | 10.6      | 1.66 (-0.19, 3.55)    |
| <b>North America</b>      | Male       | 7.8               | 9.2       | 10.6      | 10.1      | 11.6      | 1.62 (0.72, 2.53)     |
|                           | Female     | 8.8               | 10.1      | 8.7       | 9.5       | 11.5      | 1.21 (-0.18, 2.62)    |
|                           | Both sexes | 8.3               | 9.6       | 9.7       | 9.8       | 11.6      | 1.42 (0.68, 2.16)     |
| <b>Eastern Asia</b>       | Male       | 9.3               | 8.9       | 11.2      | 11.9      | 13.6      | 2.25 (1.55, 2.96)     |
|                           | Female     | 8.7               | 9.2       | 9.4       | 11.5      | 12.5      | 2.09 (1.44, 2.74)     |
|                           | Both sexes | 9.0               | 9.0       | 10.3      | 11.7      | 13.0      | 2.17 (1.74, 2.61)     |
| <b>South-eastern Asia</b> | Male       | 7.8               | 11.1      | 15.3      | 10.1      | 11.2      | 0.52 (-2.28, 3.40)    |
|                           | Female     | 14.2              | 8.7       | 8.8       | 10.5      | 11.0      | -0.03 (-2.58, 2.59)   |
|                           | Both sexes | 10.9              | 9.9       | 12.1      | 10.3      | 11.1      | 0.27 (-0.80, 1.34)    |
| <b>Southern Asia</b>      | Male       | 4.8               | 5.2       | 4.5       | 5.9       | 4.2       | -0.31 (-2.40, 1.83)   |
|                           | Female     | 3.9               | 3.5       | 2.6       | 3.8       | 4.2       | 0.89 (-1.58, 3.42)    |
|                           | Both sexes | 4.4               | 4.4       | 3.6       | 4.9       | 4.2       | 0.20 (-1.53, 1.95)    |
| <b>Western Asia</b>       | Male       | 3.4               | 5.9       | 6.7       | 8.5       | 9.4       | 3.91 (2.54, 5.30)     |
|                           | Female     | 4.2               | 2.9       | 6.3       | 8.8       | 8.1       | 4.30 (0.81, 7.91)     |
|                           | Both sexes | 3.8               | 4.5       | 6.5       | 8.7       | 8.8       | 4.09 (2.33, 5.88)     |
| <b>Eastern Europe</b>     | Male       | 4.6               | 6.4       | 6.2       | 8.8       | 8.1       | 2.57 (0.85, 4.32)     |
|                           | Female     | 5.8               | 4.5       | 4.6       | 6.3       | 7.5       | 2.05 (0.10, 4.04)     |
|                           | Both sexes | 5.2               | 5.4       | 5.5       | 7.6       | 7.8       | 2.34 (1.30, 3.39)     |

|                        |            |      |      |      |      |      |                     |
|------------------------|------------|------|------|------|------|------|---------------------|
| <b>Northern Europe</b> | Male       | 9.5  | 8.1  | 9.3  | 9.6  | 10.3 | 0.79 (-0.19, 1.78)  |
|                        | Female     | 8.5  | 10.1 | 10.2 | 12.6 | 9.3  | 0.77 (-1.21, 2.78)  |
|                        | Both sexes | 9.0  | 9.1  | 9.7  | 11.1 | 9.8  | 0.78 (-0.13, 1.69)  |
| <b>Southern Europe</b> | Male       | 8.0  | 6.4  | 7.8  | 8.1  | 8.8  | 0.97 (-0.23, 2.18)  |
|                        | Female     | 8.1  | 7.7  | 7.9  | 8.2  | 12.3 | 2.37 (0.13, 4.66)   |
|                        | Both sexes | 8.0  | 7.0  | 7.9  | 8.2  | 10.5 | 1.68 (0.20, 3.19)   |
| <b>Western Europe</b>  | Male       | 8.8  | 11.4 | 9.0  | 9.9  | 10.1 | 0.25 (-0.98, 1.50)  |
|                        | Female     | 7.1  | 8.7  | 9.5  | 8.8  | 10.6 | 1.60 (0.61, 2.61)   |
|                        | Both sexes | 8.0  | 10.1 | 9.2  | 9.4  | 10.3 | 0.88 (0.00, 1.77)   |
| <b>Oceania</b>         | Male       | 14.1 | 10.6 | 10.3 | 13.0 | 15.4 | 1.03 (-1.30, 3.40)  |
|                        | Female     | 11.4 | 9.1  | 10.1 | 10.3 | 10.5 | -0.02 (-1.14, 1.10) |
|                        | Both sexes | 12.8 | 9.8  | 10.2 | 11.7 | 13.0 | 0.57 (-0.13, 1.41)  |

\* Rates were not calculated for time periods with less than five cases.

- Denotes time periods without data.

Supplementary Table 5: Incidence rates (per million) of non-Hodgkin lymphoma by region, sex, and year of diagnosis

| Region                    | Sex        | Year of Diagnosis |           |           |           |           | AAPC<br>(95% CI)      |
|---------------------------|------------|-------------------|-----------|-----------|-----------|-----------|-----------------------|
|                           |            | 1988-1992         | 1993-1997 | 1998-2002 | 2003-2007 | 2008-2012 |                       |
| <b>Northern Africa</b>    | Male       | 16.3              | 9.7       | 24.6      | 20.3      | 13.8      | 0.62 (-4.51, 6.03)    |
|                           | Female     | *                 | *         | 9.4       | 13.3      | *         | 3.20 (-5.53, 12.73)   |
|                           | Both sexes | 10.7              | 6.9       | 17.2      | 16.9      | 8.9       | 1.41 (-4.38, 7.56)    |
| <b>Sub-Saharan Africa</b> | Male       | *                 | *         | 4.5       | *         | *         | -0.08 (-7.92, 8.42)   |
|                           | Female     | *                 | *         | *         | *         | *         | 0.70 (-7.89, 10.10)   |
|                           | Both sexes | 3.8               | *         | 3.1       | 1.5       | 1.2       | 0.26 (-7.83, 9.06)    |
| <b>Caribbean</b>          | Male       | -                 | *         | 37.3      | 7.3       | 6.9       | -2.01 (-18.35, 17.60) |
|                           | Female     | -                 | *         | *         | *         | *         | 1.08 (-10.84, 14.60)  |
|                           | Both sexes | -                 | *         | 24.4      | 5.3       | 5.6       | -1.09 (-16.23, 16.77) |
| <b>Central America</b>    | Male       | 22.0              | 16.9      | 7.9       | 13.8      | 13.8      | -2.85 (-7.08, 1.57)   |
|                           | Female     | *                 | 12.7      | *         | 6.7       | *         | -0.40 (-8.25, 8.12)   |
|                           | Both sexes | 12.7              | 14.8      | 6.1       | 10.3      | 8.5       | -2.24 (-6.00, 1.68)   |
| <b>South America</b>      | Male       | 14.2              | 14.6      | 18.0      | 17.3      | 14.4      | -0.06 (-1.83, 1.73)   |
|                           | Female     | 8.5               | 13.6      | 13.2      | 9.0       | 7.5       | -1.89 (-5.11, 1.43)   |
|                           | Both sexes | 11.4              | 14.1      | 15.6      | 13.2      | 11.0      | -0.76 (-2.86, 1.40)   |
| <b>North America</b>      | Male       | 9.9               | 10.5      | 9.0       | 9.8       | 13.2      | 1.44 (-0.58, 3.51)    |
|                           | Female     | 6.0               | 5.0       | 5.9       | 5.7       | 8.5       | 2.13 (-0.22, 4.54)    |
|                           | Both sexes | 8.0               | 7.8       | 7.5       | 7.8       | 10.9      | 1.69 (-0.33, 3.75)    |
| <b>Eastern Asia</b>       | Male       | 14.6              | 12.0      | 12.2      | 12.1      | 14.1      | 0.29 (-1.02, 1.62)    |
|                           | Female     | 7.9               | 8.6       | 7.5       | 6.6       | 11.1      | 1.62 (-1.35, 4.68)    |
|                           | Both sexes | 11.3              | 10.4      | 9.9       | 9.5       | 12.6      | 0.79 (-0.98, 2.59)    |
| <b>South-eastern Asia</b> | Male       | 11.3              | 11.1      | 8.9       | 7.3       | 8.6       | -1.93 (-3.42, -0.42)  |
|                           | Female     | 5.6               | 7.2       | 7.9       | 4.7       | 5.0       | -1.86 (-4.49, 0.84)   |
|                           | Both sexes | 8.5               | 9.2       | 8.4       | 6.0       | 6.8       | -1.90 (-3.45, -0.33)  |
| <b>Southern Asia</b>      | Male       | 6.5               | 7.8       | 8.4       | 6.4       | 4.8       | -1.90 (-4.29, 0.54)   |
|                           | Female     | 3.2               | 3.2       | 4.2       | 3.2       | 3.1       | -0.29 (-2.19, 1.65)   |
|                           | Both sexes | 4.9               | 5.6       | 6.4       | 4.9       | 4.0       | -1.35 (-3.51, 0.86)   |
| <b>Western Asia</b>       | Male       | 15.9              | 19.9      | 12.5      | 12.1      | 13.9      | -1.35 (-3.65, 1.00)   |
|                           | Female     | 14.3              | 16.0      | 6.3       | 7.6       | 7.6       | -3.73 (-7.39, 0.08)   |
|                           | Both sexes | 15.1              | 18.0      | 9.5       | 9.9       | 10.8      | -2.26 (-5.06, 0.62)   |
| <b>Eastern Europe</b>     | Male       | 14.1              | 11.4      | 11.7      | 9.4       | 10.9      | -1.27 (-2.60, 0.08)   |
|                           | Female     | 7.2               | 7.7       | 5.3       | 6.1       | 5.6       | -1.43 (-2.63, -0.20)  |
|                           | Both sexes | 10.7              | 9.6       | 8.6       | 7.8       | 8.3       | -1.32 (-2.13, -0.49)  |

|                        |            |      |      |      |      |      |                     |
|------------------------|------------|------|------|------|------|------|---------------------|
| <b>Northern Europe</b> | Male       | 11.5 | 9.9  | 9.7  | 9.5  | 10.6 | -0.36 (-1.39, 0.69) |
|                        | Female     | 6.4  | 5.3  | 4.9  | 4.7  | 5.6  | -0.78 (-2.30, 0.77) |
|                        | Both sexes | 9.0  | 7.7  | 7.4  | 7.2  | 8.2  | -0.49 (-1.69, 0.72) |
| <b>Southern Europe</b> | Male       | 14.6 | 14.9 | 16.3 | 16.3 | 13.5 | -0.27 (-1.52, 1.00) |
|                        | Female     | 8.5  | 10.3 | 10.8 | 8.2  | 9.1  | -0.35 (-2.13, 1.46) |
|                        | Both sexes | 11.6 | 12.7 | 13.6 | 12.4 | 11.4 | -0.30 (-1.37, 0.79) |
| <b>Western Europe</b>  | Male       | 15.2 | 14.8 | 11.8 | 10.3 | 13.3 | -0.85 (-2.75, 1.09) |
|                        | Female     | 7.9  | 7.8  | 5.6  | 5.8  | 7.6  | -0.21 (-2.59, 2.23) |
|                        | Both sexes | 11.6 | 11.4 | 8.8  | 8.1  | 10.5 | -0.63 (-2.67, 1.45) |
| <b>Oceania</b>         | Male       | 12.9 | 12.8 | 7.6  | 9.0  | 15.0 | 0.32 (-3.57, 4.37)  |
|                        | Female     | 9.8  | 6.0  | 3.4  | 3.9  | 5.6  | -3.25 (-7.63, 1.34) |
|                        | Both sexes | 11.4 | 9.5  | 5.6  | 6.5  | 10.4 | -0.82 (-4.83, 3.37) |

\* Rates were not calculated for time periods with less than five cases.

- Denotes time periods without data.

Supplementary Table 6: Incidence rates (per million) of ependymal tumors by region, sex, and year of diagnosis

| Region                    | Sex        | Year of Diagnosis |           |           |           |           | AAPC<br>(95% CI)      |
|---------------------------|------------|-------------------|-----------|-----------|-----------|-----------|-----------------------|
|                           |            | 1988-1992         | 1993-1997 | 1998-2002 | 2003-2007 | 2008-2012 |                       |
| <b>Northern Africa</b>    | Male       | *                 | *         | *         | *         | *         | 1.91 (-15.67, 23.15)  |
|                           | Female     | *                 | *         | *         | 2.4       | *         | 1.94 (-12.01, 18.11)  |
|                           | Both sexes | *                 | *         | *         | 1.6       | *         | 1.93 (-11.88, 17.89)  |
| <b>Sub-Saharan Africa</b> | Male       | *                 | *         | *         | *         | *         | -4.26 (-12.65, 4.94)  |
|                           | Female     | *                 | *         | *         | *         | *         | 16.96 (-3.98, 42.45)  |
|                           | Both sexes | *                 | *         | *         | *         | *         | 0.58 (-8.75, 10.87)   |
| <b>Caribbean</b>          | Male       | -                 | *         | *         | *         | *         | -10.54 (-20.44, 0.59) |
|                           | Female     | -                 | *         | *         | *         | *         | -2.63 (-6.04, 0.90)   |
|                           | Both sexes | -                 | 6.6       | *         | 3.7       | *         | -6.47 (-10.15, -2.63) |
| <b>Central America</b>    | Male       | *                 | *         | *         | *         | *         | 2.26 (-2.60, 7.36)    |
|                           | Female     | *                 | *         | *         | *         | *         | 5.07 (3.65, 6.50)     |
|                           | Both sexes | 2.5               | *         | 4.0       | 3.3       | 5.7       | 3.67 (0.95, 6.47)     |
| <b>South America</b>      | Male       | *                 | *         | 3.2       | 3.3       | 4.2       | 6.19 (1.57, 11.02)    |
|                           | Female     | *                 | *         | 3.1       | 2.0       | 2.8       | 2.19 (-2.62, 7.24)    |
|                           | Both sexes | *                 | 2.5       | 3.2       | 2.7       | 3.5       | 4.35 (-0.06, 8.95)    |
| <b>North America</b>      | Male       | 6.5               | 6.0       | 3.6       | 4.5       | 5.2       | -1.13 (-4.14, 1.97)   |
|                           | Female     | 4.0               | 2.9       | 4.2       | 3.9       | 4.8       | 1.40 (-0.58, 3.42)    |
|                           | Both sexes | 5.3               | 4.5       | 3.9       | 4.2       | 5.0       | -0.04 (-1.98, 1.94)   |
| <b>Eastern Asia</b>       | Male       | *                 | 2.5       | 3.1       | 2.9       | 2.2       | 1.78 (-4.17, 8.10)    |
|                           | Female     | 1.5               | 2.1       | 3.2       | 2.9       | 2.9       | 2.39 (-0.21, 5.05)    |
|                           | Both sexes | 0.9               | 2.3       | 3.1       | 2.9       | 2.5       | 2.09 (-1.95, 6.29)    |
| <b>South-eastern Asia</b> | Male       | *                 | *         | 1.6       | 0.9       | 1.0       | 4.89 (-3.07, 13.51)   |
|                           | Female     | *                 | *         | *         | 1.5       | 0.8       | 7.12 (-3.74, 19.21)   |
|                           | Both sexes | *                 | 0.4       | 1.0       | 1.2       | 0.9       | 5.86 (-0.32, 12.43)   |
| <b>Southern Asia</b>      | Male       | *                 | 0.7       | 0.9       | 1.1       | 1.6       | 4.66 (2.23, 7.14)     |
|                           | Female     | *                 | 0.6       | *         | 1.0       | 0.9       | 3.89 (1.03, 6.83)     |
|                           | Both sexes | 0.6               | 0.6       | 0.7       | 1.0       | 1.3       | 4.37 (3.08, 5.68)     |
| <b>Western Asia</b>       | Male       | *                 | 2.4       | 5.3       | 4.2       | 3.4       | 2.10 (-4.38, 9.02)    |
|                           | Female     | *                 | 2.6       | 1.5       | 4.0       | 3.5       | 3.19 (-1.58, 8.19)    |
|                           | Both sexes | 1.5               | 2.5       | 3.4       | 4.1       | 3.4       | 2.57 (-0.52, 5.76)    |
| <b>Eastern Europe</b>     | Male       | 1.7               | 2.1       | 2.1       | 2.9       | 5.0       | 5.99 (3.49, 8.55)     |
|                           | Female     | 1.3               | 1.6       | 2.2       | 2.8       | 3.3       | 4.78 (4.12, 5.45)     |
|                           | Both sexes | 1.5               | 1.9       | 2.1       | 2.9       | 4.1       | 5.46 (4.35, 6.59)     |

|                        |            |     |     |     |     |     |                     |
|------------------------|------------|-----|-----|-----|-----|-----|---------------------|
| <b>Northern Europe</b> | Male       | 4.2 | 4.1 | 5.4 | 4.4 | 3.6 | -0.35 (-2.52, 1.87) |
|                        | Female     | 4.0 | 2.6 | 2.8 | 2.8 | 3.3 | -0.64 (-3.01, 1.78) |
|                        | Both sexes | 4.1 | 3.4 | 4.1 | 3.6 | 3.5 | -0.47 (-1.79, 0.87) |
| <b>Southern Europe</b> | Male       | 2.1 | 5.5 | 3.4 | 4.8 | 4.9 | 2.24 (-1.69, 6.33)  |
|                        | Female     | 1.8 | 2.9 | 3.4 | 4.1 | 3.6 | 2.69 (0.30, 5.14)   |
|                        | Both sexes | 2.0 | 4.2 | 3.4 | 4.5 | 4.2 | 2.43 (-0.46, 5.41)  |
| <b>Western Europe</b>  | Male       | 6.3 | 3.4 | 4.6 | 4.4 | 4.9 | -0.40 (-2.92, 2.19) |
|                        | Female     | 4.2 | 3.6 | 4.3 | 3.6 | 4.8 | 0.94 (-0.77, 2.68)  |
|                        | Both sexes | 5.3 | 3.5 | 4.4 | 4.0 | 4.9 | 0.21 (-1.82, 2.28)  |
| <b>Oceania</b>         | Male       | 2.7 | 3.7 | 3.9 | 4.2 | 7.1 | 4.55 (2.56, 6.57)   |
|                        | Female     | *   | 4.1 | 4.9 | 3.7 | 3.0 | 1.31 (-4.34, 7.29)  |
|                        | Both sexes | 2.0 | 3.9 | 4.4 | 4.0 | 5.1 | 3.13 (0.51, 5.81)   |

\* Rates were not calculated for time periods with less than five cases.

- Denotes time periods without data.

Supplementary Table 7: Incidence rates (per million) of astrocytic tumors by region, sex, and year of diagnosis

| Region                    | Sex        | Year of Diagnosis |           |           |           |           | AAPC<br>(95% CI)        |
|---------------------------|------------|-------------------|-----------|-----------|-----------|-----------|-------------------------|
|                           |            | 1988-1992         | 1993-1997 | 1998-2002 | 2003-2007 | 2008-2012 |                         |
| <b>Northern Africa</b>    | Male       | *                 | *         | *         | 4.1       | *         | 17.29 (1.34, 35.74)     |
|                           | Female     | *                 | *         | *         | 2.8       | *         | 14.39 (-16.23, 56.19)   |
|                           | Both sexes | *                 | *         | *         | 3.5       | *         | 16.30 (-3.88, 40.70)    |
| <b>Sub-Saharan Africa</b> | Male       | *                 | *         | *         | *         | *         | 0.51 (-20.16, 26.52)    |
|                           | Female     | *                 | *         | *         | *         | *         | -27.69 (-37.27, -16.64) |
|                           | Both sexes | *                 | *         | *         | *         | *         | -11.90 (-20.16, -2.79)  |
| <b>Caribbean</b>          | Male       | -                 | 13.0      | *         | 18.7      | 12.4      | 1.32 (-9.99, 14.06)     |
|                           | Female     | -                 | 11.1      | *         | 9.7       | 7.2       | -1.52 (-11.70, 9.84)    |
|                           | Both sexes | -                 | 12.1      | *         | 14.3      | 9.9       | 0.26 (-10.52, 12.33)    |
| <b>Central America</b>    | Male       | 8.0               | *         | *         | *         | *         | -5.78 (-7.30, -4.23)    |
|                           | Female     | 9.4               | *         | *         | *         | *         | -6.90 (-10.70, -2.94)   |
|                           | Both sexes | 8.7               | 8.7       | 3.5       | 3.3       | *         | -6.35 (-9.02, -3.60)    |
| <b>South America</b>      | Male       | 2.3               | 6.3       | 3.7       | 4.7       | 5.1       | 2.37 (-1.09, 5.95)      |
|                           | Female     | 2.8               | 14.3      | 6.7       | 3.9       | 4.8       | -1.92 (-8.86, 5.56)     |
|                           | Both sexes | 2.6               | 10.2      | 5.2       | 4.3       | 5.0       | -0.06 (-5.44, 5.62)     |
| <b>North America</b>      | Male       | 14.2              | 13.0      | 12.7      | 12.4      | 12.3      | -0.64 (-0.95, -0.32)    |
|                           | Female     | 14.4              | 11.7      | 12.2      | 12.8      | 13.7      | 0.14 (-1.00, 1.29)      |
|                           | Both sexes | 14.3              | 12.3      | 12.5      | 12.6      | 13.0      | -0.26 (-0.97, 0.46)     |
| <b>Eastern Asia</b>       | Male       | 4.2               | 4.0       | 2.9       | 2.1       | 2.1       | -3.90 (-5.27, -2.51)    |
|                           | Female     | 3.7               | 3.7       | 1.7       | 2.6       | 2.2       | -2.60 (-5.80, 0.70)     |
|                           | Both sexes | 3.9               | 3.8       | 2.3       | 2.3       | 2.2       | -3.30 (-5.05, -1.52)    |
| <b>South-eastern Asia</b> | Male       | *                 | 2.5       | 2.1       | 1.6       | 2.9       | 1.61 (-2.35, 5.74)      |
|                           | Female     | 4.1               | 3.3       | 1.4       | 2.7       | 1.8       | -3.57 (-6.95, -0.07)    |
|                           | Both sexes | 2.7               | 2.9       | 1.8       | 2.1       | 2.4       | -1.13 (-3.31, 1.09)     |
| <b>Southern Asia</b>      | Male       | 4.0               | 3.6       | 4.4       | 2.5       | 1.6       | -4.07 (-7.33, -0.70)    |
|                           | Female     | 1.3               | 2.6       | 1.9       | 1.4       | 1.3       | -2.14 (-5.97, 1.85)     |
|                           | Both sexes | 2.7               | 3.1       | 3.2       | 2.0       | 1.5       | -3.36 (-6.26, -0.38)    |
| <b>Western Asia</b>       | Male       | 4.6               | 4.5       | 5.6       | 4.4       | 6.2       | 1.59 (-0.37, 3.58)      |
|                           | Female     | 6.0               | 4.0       | 3.9       | 4.0       | 4.2       | -0.78 (-2.57, 1.05)     |
|                           | Both sexes | 5.2               | 4.3       | 4.7       | 4.2       | 5.3       | 0.54 (-1.00, 2.11)      |
| <b>Eastern Europe</b>     | Male       | 5.1               | 7.9       | 4.8       | 7.5       | 7.5       | 1.40 (-0.95, 3.81)      |
|                           | Female     | 4.5               | 5.5       | 4.2       | 7.1       | 6.5       | 1.98 (-0.10, 4.10)      |
|                           | Both sexes | 4.8               | 6.7       | 4.5       | 7.3       | 7.0       | 1.66 (-0.46, 3.83)      |

|                        |            |      |      |     |     |     |                      |
|------------------------|------------|------|------|-----|-----|-----|----------------------|
| <b>Northern Europe</b> | Male       | 7.1  | 13.9 | 5.3 | 5.8 | 3.7 | -4.58 (-10.21, 1.41) |
|                        | Female     | 7.3  | 12.2 | 5.6 | 5.8 | 4.9 | -3.44 (-7.76, 1.07)  |
|                        | Both sexes | 7.2  | 13.1 | 5.4 | 5.8 | 4.3 | -4.02 (-9.00, 1.22)  |
| <b>Southern Europe</b> | Male       | 7.0  | 9.4  | 5.8 | 5.7 | 7.3 | -0.76 (-3.59, 2.15)  |
|                        | Female     | 8.8  | 9.6  | 7.2 | 6.7 | 4.2 | -3.56 (-5.46, -1.62) |
|                        | Both sexes | 7.9  | 9.5  | 6.5 | 6.2 | 5.8 | -2.15 (-3.81, -0.45) |
| <b>Western Europe</b>  | Male       | 12.0 | 9.3  | 5.2 | 4.7 | 3.6 | -6.01 (-7.39, -4.61) |
|                        | Female     | 9.3  | 12.6 | 4.8 | 3.3 | 4.1 | -5.60 (-9.79, -1.21) |
|                        | Both sexes | 10.7 | 10.9 | 5.0 | 4.0 | 3.8 | -5.81 (-8.35, -3.20) |
| <b>Oceania</b>         | Male       | 7.8  | 18.7 | 5.2 | 3.5 | 3.3 | -6.80 (-14.63, 1.75) |
|                        | Female     | 10.1 | 16.6 | 4.9 | 3.4 | 4.4 | -6.48 (-12.66, 0.14) |
|                        | Both sexes | 8.9  | 17.7 | 5.0 | 3.5 | 3.8 | -6.64 (-13.60, 0.87) |

\* Rates were not calculated for time periods with less than five cases.

- Denotes time periods without data.



Supplementary Table 8: Incidence rates (per million) of medulloblastoma by region, sex, and year of diagnosis

| Region                    | Sex        | Year of Diagnosis |           |           |           |           | AAPC<br>(95% CI)       |
|---------------------------|------------|-------------------|-----------|-----------|-----------|-----------|------------------------|
|                           |            | 1988-1992         | 1993-1997 | 1998-2002 | 2003-2007 | 2008-2012 |                        |
| <b>Northern Africa</b>    | Male       | *                 | *         | *         | 2.3       | *         | 1.91 (-10.76, 16.38)   |
|                           | Female     | *                 | *         | *         | *         | *         | -4.11 (-16.89, 10.62)  |
|                           | Both sexes | *                 | 4.9       | 1.9       | 1.9       | *         | -0.70 (-11.69, 11.66)  |
| <b>Sub-Saharan Africa</b> | Male       | *                 | *         | *         | *         | *         | -3.11 (-12.52, 7.31)   |
|                           | Female     | *                 | *         | *         | *         | *         | -2.82 (-5.98, 0.46)    |
|                           | Both sexes | *                 | *         | *         | *         | 1.0       | -2.97 (-8.24, 2.60)    |
| <b>Caribbean</b>          | Male       | -                 | *         | *         | 6.2       | *         | -2.01 (-12.03, 9.15)   |
|                           | Female     | -                 | *         | *         | *         | *         | -12.17 (-32.55, 14.37) |
|                           | Both sexes | -                 | 6.6       | *         | 3.2       | 3.5       | -3.90 (-14.29, 7.75)   |
| <b>Central America</b>    | Male       | 5.0               | *         | *         | 5.3       | *         | 0.63 (-4.77, 6.33)     |
|                           | Female     | *                 | *         | *         | *         | *         | 4.30 (-10.13, 21.05)   |
|                           | Both sexes | 4.1               | *         | *         | 4.9       | 5.0       | 1.89 (-5.75, 10.16)    |
| <b>South America</b>      | Male       | 3.7               | *         | 3.0       | 4.6       | 7.7       | 5.77 (1.68, 10.03)     |
|                           | Female     | *                 | 3.6       | 4.1       | 3.9       | 4.8       | 3.83 (0.77, 6.98)      |
|                           | Both sexes | 2.6               | 3.2       | 3.6       | 4.2       | 6.3       | 4.90 (3.36, 6.47)      |
| <b>North America</b>      | Male       | 5.4               | 7.9       | 5.0       | 6.4       | 6.9       | 0.64 (-1.91, 3.25)     |
|                           | Female     | 4.2               | 5.4       | 4.8       | 3.3       | 3.8       | -1.50 (-3.71, 0.76)    |
|                           | Both sexes | 4.8               | 6.6       | 4.9       | 4.9       | 5.4       | -0.21 (-2.06, 1.68)    |
| <b>Eastern Asia</b>       | Male       | 1.2               | 4.0       | 5.8       | 4.9       | 4.3       | 1.97 (-3.02, 7.23)     |
|                           | Female     | 2.1               | 2.6       | 2.9       | 2.7       | 2.0       | -0.66 (-2.97, 1.71)    |
|                           | Both sexes | 1.6               | 3.3       | 4.4       | 3.9       | 3.2       | 1.04 (-2.78, 5.01)     |
| <b>South-eastern Asia</b> | Male       | 2.8               | 3.9       | 4.3       | 4.5       | 4.2       | 1.26 (-0.21, 2.76)     |
|                           | Female     | 2.6               | 2.8       | 3.4       | 2.3       | 2.0       | -1.81 (-3.96, 0.39)    |
|                           | Both sexes | 2.7               | 3.4       | 3.9       | 3.5       | 3.1       | 0.11 (-1.40, 1.65)     |
| <b>Southern Asia</b>      | Male       | 3.8               | 2.7       | 3.7       | 3.6       | 2.4       | -1.10 (-3.90, 1.80)    |
|                           | Female     | 3.4               | 0.9       | 2.1       | 1.7       | 1.5       | -2.00 (-7.77, 4.13)    |
|                           | Both sexes | 3.6               | 1.9       | 2.9       | 2.7       | 2.0       | -1.37 (-4.85, 2.22)    |
| <b>Western Asia</b>       | Male       | 5.7               | 4.9       | 6.0       | 5.5       | 5.9       | 0.43 (-0.58, 1.46)     |
|                           | Female     | 3.0               | 6.2       | 3.1       | 3.8       | 4.0       | -0.49 (-4.18, 3.34)    |
|                           | Both sexes | 4.4               | 5.5       | 4.6       | 4.6       | 5.0       | 0.06 (-1.07, 1.21)     |
| <b>Eastern Europe</b>     | Male       | 5.1               | 3.5       | 6.2       | 6.2       | 6.4       | 1.84 (-0.30, 4.02)     |
|                           | Female     | 3.2               | 1.6       | 3.7       | 4.3       | 4.3       | 2.73 (-0.50, 6.07)     |
|                           | Both sexes | 4.2               | 2.6       | 5.0       | 5.3       | 5.4       | 2.18 (-0.33, 4.75)     |

|                        |            |     |     |     |     |     |                      |
|------------------------|------------|-----|-----|-----|-----|-----|----------------------|
| <b>Northern Europe</b> | Male       | 7.1 | 5.9 | 6.4 | 6.7 | 5.2 | -0.89 (-2.26, 0.50)  |
|                        | Female     | 5.1 | 4.2 | 4.0 | 3.6 | 4.1 | -1.11 (-2.35, 0.15)  |
|                        | Both sexes | 6.1 | 5.1 | 5.3 | 5.2 | 4.7 | -0.97 (-1.75, -0.19) |
| <b>Southern Europe</b> | Male       | 6.6 | 7.3 | 6.8 | 8.1 | 6.5 | 0.12 (-1.35, 1.61)   |
|                        | Female     | 1.8 | 3.9 | 4.9 | 4.9 | 4.2 | 2.36 (-1.29, 6.14)   |
|                        | Both sexes | 4.3 | 5.6 | 5.9 | 6.6 | 5.4 | 0.90 (-0.95, 2.78)   |
| <b>Western Europe</b>  | Male       | 5.3 | 5.0 | 6.7 | 6.4 | 6.5 | 1.07 (-0.06, 2.21)   |
|                        | Female     | 3.3 | 6.2 | 4.1 | 3.8 | 5.0 | 0.60 (-2.49, 3.79)   |
|                        | Both sexes | 4.3 | 5.6 | 5.5 | 5.1 | 5.8 | 0.88 (-0.22, 1.99)   |
| <b>Oceania</b>         | Male       | 4.8 | 7.9 | 7.1 | 6.7 | 7.1 | 0.84 (-1.34, 3.06)   |
|                        | Female     | 2.2 | 4.9 | 3.6 | 3.2 | 4.0 | 0.75 (-3.03, 4.66)   |
|                        | Both sexes | 3.5 | 6.4 | 5.4 | 5.0 | 5.5 | 0.81 (-1.88, 3.57)   |

\* Rates were not calculated for time periods with less than five cases.

- Denotes time periods without data.

Supplementary Table 9: Incidence rates (per million) of neuroblastoma by region, sex, and year of diagnosis

| Region                    | Sex        | Year of Diagnosis |           |           |           |           | AAPC<br>(95% CI)       |
|---------------------------|------------|-------------------|-----------|-----------|-----------|-----------|------------------------|
|                           |            | 1988-1992         | 1993-1997 | 1998-2002 | 2003-2007 | 2008-2012 |                        |
| <b>Northern Africa</b>    | Male       | *                 | 9.7       | 6.0       | 10.8      | 8.6       | 5.81 (-3.45, 15.95)    |
|                           | Female     | *                 | *         | *         | 8.1       | *         | 4.42 (-9.58, 20.59)    |
|                           | Both sexes | *                 | 4.9       | 4.6       | 9.5       | 5.3       | 4.29 (-1.69, 10.64)    |
| <b>Sub-Saharan Africa</b> | Male       | *                 | *         | *         | *         | *         | -8.44 (-14.76, -1.65)  |
|                           | Female     | *                 | *         | *         | *         | *         | -10.45 (-28.13, 11.57) |
|                           | Both sexes | *                 | 2.1       | *         | *         | *         | -6.48 (-19.65, 8.84)   |
| <b>Caribbean</b>          | Male       | -                 | *         | *         | 8.3       | *         | -0.39 (-5.00, 4.45)    |
|                           | Female     | -                 | *         | *         | *         | 8.6       | 0.32 (-13.60, 16.48)   |
|                           | Both sexes | -                 | 6.6       | *         | 5.3       | 7.0       | -0.07 (-3.79, 3.80)    |
| <b>Central America</b>    | Male       | *                 | *         | 6.9       | *         | 11.1      | 2.43 (-3.56, 8.80)     |
|                           | Female     | 5.2               | *         | *         | *         | 11.6      | 5.78 (-5.15, 17.97)    |
|                           | Both sexes | 4.1               | *         | 4.5       | 3.8       | 11.3      | 7.33 (2.13, 12.80)     |
| <b>South America</b>      | Male       | 3.2               | 3.5       | 15.5      | 9.8       | 7.7       | 1.43 (-6.14, 9.60)     |
|                           | Female     | 2.8               | 5.7       | 18.6      | 10.5      | 7.5       | 0.56 (-7.74, 9.60)     |
|                           | Both sexes | 3.0               | 4.6       | 17.0      | 10.2      | 7.6       | 0.97 (-6.94, 9.56)     |
| <b>North America</b>      | Male       | 12.7              | 16.5      | 13.7      | 15.5      | 14.5      | 0.31 (-1.01, 1.66)     |
|                           | Female     | 12.9              | 13.4      | 11.3      | 12.2      | 14.1      | 0.39 (-0.96, 1.77)     |
|                           | Both sexes | 12.8              | 15.0      | 12.5      | 13.9      | 14.3      | 0.35 (-0.66, 1.37)     |
| <b>Eastern Asia</b>       | Male       | 9.3               | 12.7      | 17.6      | 18.2      | 12.5      | 0.71 (-2.84, 4.39)     |
|                           | Female     | 8.9               | 12.0      | 13.1      | 15.4      | 12.1      | 0.99 (-1.24, 3.28)     |
|                           | Both sexes | 9.1               | 12.4      | 15.5      | 16.9      | 12.3      | 0.84 (-2.08, 3.84)     |
| <b>South-eastern Asia</b> | Male       | 2.8               | 3.2       | 3.8       | 2.8       | 4.6       | 2.00 (-0.60, 4.66)     |
|                           | Female     | *                 | 2.0       | 6.2       | 2.2       | 2.6       | 0.85 (-6.74, 9.07)     |
|                           | Both sexes | 2.2               | 2.6       | 5.0       | 2.5       | 3.6       | 1.51 (-2.71, 5.92)     |
| <b>Southern Asia</b>      | Male       | 5.9               | 8.7       | 6.3       | 4.1       | 2.6       | -4.96 (-8.60, -1.17)   |
|                           | Female     | 3.9               | 6.0       | 3.9       | 2.8       | 2.7       | -3.55 (-6.79, -0.20)   |
|                           | Both sexes | 4.9               | 7.4       | 5.1       | 3.5       | 2.6       | -4.37 (-7.75, -0.87)   |
| <b>Western Asia</b>       | Male       | 10.8              | 11.2      | 10.2      | 15.2      | 15.2      | 2.30 (0.59, 4.04)      |
|                           | Female     | 13.1              | 11.3      | 7.3       | 12.2      | 12.1      | 0.65 (-2.46, 3.86)     |
|                           | Both sexes | 11.9              | 11.2      | 8.8       | 13.7      | 13.7      | 1.56 (-0.77, 3.93)     |
| <b>Eastern Europe</b>     | Male       | 1.9               | 3.7       | 4.2       | 4.8       | 6.7       | 5.39 (3.70, 7.11)      |
|                           | Female     | 3.2               | 2.4       | 4.4       | 3.3       | 6.6       | 4.42 (0.39, 8.62)      |
|                           | Both sexes | 2.5               | 3.1       | 4.3       | 4.1       | 6.6       | 4.93 (2.85, 7.05)      |

|                        |            |      |      |      |      |      |                     |
|------------------------|------------|------|------|------|------|------|---------------------|
| <b>Northern Europe</b> | Male       | 10.0 | 10.7 | 12.6 | 13.1 | 13.2 | 1.50 (0.85, 2.15)   |
|                        | Female     | 9.3  | 8.6  | 12.1 | 11.9 | 9.6  | 0.83 (-1.34, 3.05)  |
|                        | Both sexes | 9.7  | 9.6  | 12.4 | 12.5 | 11.5 | 1.20 (-0.14, 2.55)  |
| <b>Southern Europe</b> | Male       | 11.8 | 12.2 | 15.5 | 15.6 | 16.6 | 1.75 (0.91, 2.60)   |
|                        | Female     | 11.4 | 11.6 | 13.2 | 13.1 | 19.3 | 2.76 (0.98, 4.57)   |
|                        | Both sexes | 11.6 | 11.9 | 14.4 | 14.4 | 17.9 | 2.23 (1.34, 3.12)   |
| <b>Western Europe</b>  | Male       | 10.3 | 11.8 | 17.6 | 15.6 | 18.2 | 2.39 (0.66, 4.16)   |
|                        | Female     | 11.3 | 11.5 | 14.0 | 13.9 | 14.6 | 1.26 (0.60, 1.94)   |
|                        | Both sexes | 10.8 | 11.7 | 15.8 | 14.7 | 16.4 | 1.88 (0.66, 3.11)   |
| <b>Oceania</b>         | Male       | 12.9 | 18.9 | 13.5 | 14.2 | 18.1 | 0.70 (-1.70, 3.15)  |
|                        | Female     | 13.6 | 11.7 | 15.5 | 13.7 | 12.1 | -0.17 (-1.83, 1.52) |
|                        | Both sexes | 13.2 | 15.4 | 14.5 | 14.0 | 15.2 | 0.31 (-0.47, 1.10)  |

\* Rates were not calculated for time periods with less than five cases.

- Denotes time periods without data.

Supplementary Table 10: Incidence rates (per million) of retinoblastoma by region, sex, and year of diagnosis

| Region                    | Sex        | Year of Diagnosis |           |           |           |           | AAPC<br>(95% CI)      |
|---------------------------|------------|-------------------|-----------|-----------|-----------|-----------|-----------------------|
|                           |            | 1988-1992         | 1993-1997 | 1998-2002 | 2003-2007 | 2008-2012 |                       |
| <b>Northern Africa</b>    | Male       | *                 | 11.6      | *         | 5.9       | *         | -1.45 (-16.18, 15.88) |
|                           | Female     | *                 | 16.0      | *         | 5.7       | *         | -2.42 (-15.94, 13.26) |
|                           | Both sexes | *                 | 13.8      | 3.1       | 5.8       | *         | -1.96 (-15.69, 14.01) |
| <b>Sub-Saharan Africa</b> | Male       | 16.3              | 17.3      | 12.5      | 21.9      | 16.5      | 0.47 (-2.16, 3.16)    |
|                           | Female     | 9.7               | 11.3      | 12.1      | 20.7      | 9.4       | 0.50 (-4.68, 5.97)    |
|                           | Both sexes | 13.0              | 14.3      | 12.3      | 21.3      | 13.0      | 0.49 (-2.98, 4.10)    |
| <b>Caribbean</b>          | Male       | -                 | *         | *         | *         | 6.9       | -3.23 (-25.82, 26.23) |
|                           | Female     | -                 | *         | *         | 6.5       | 13.0      | 0.73 (-9.42, 12.02)   |
|                           | Both sexes | -                 | 7.7       | 19.0      | 3.2       | 9.9       | -0.64 (-14.32, 15.23) |
| <b>Central America</b>    | Male       | 9.0               | *         | 4.9       | 12.7      | 9.7       | 1.47 (-3.37, 6.56)    |
|                           | Female     | 8.3               | *         | 11.4      | 11.1      | 10.2      | 2.36 (-4.83, 10.09)   |
|                           | Both sexes | 8.7               | *         | 8.1       | 11.9      | 9.9       | 1.91 (-1.85, 5.83)    |
| <b>South America</b>      | Male       | 11.4              | 12.5      | 17.5      | 13.1      | 11.1      | -0.79 (-3.60, 2.10)   |
|                           | Female     | 14.7              | 8.6       | 16.8      | 10.7      | 12.4      | -0.87 (-4.00, 2.37)   |
|                           | Both sexes | 13.0              | 10.6      | 17.1      | 11.9      | 11.7      | -0.83 (-3.42, 1.84)   |
| <b>North America</b>      | Male       | 8.7               | 9.7       | 10.9      | 9.1       | 9.3       | -0.08 (-1.38, 1.24)   |
|                           | Female     | 8.5               | 9.3       | 8.1       | 9.6       | 9.9       | 0.78 (-0.21, 1.77)    |
|                           | Both sexes | 8.6               | 9.5       | 9.5       | 9.3       | 9.6       | 0.32 (-0.10, 0.75)    |
| <b>Eastern Asia</b>       | Male       | 6.5               | 9.5       | 9.4       | 10.5      | 7.4       | -0.14 (-2.77, 2.56)   |
|                           | Female     | 6.0               | 7.9       | 9.2       | 9.7       | 7.4       | 0.47 (-1.93, 2.92)    |
|                           | Both sexes | 6.3               | 8.7       | 9.3       | 10.1      | 7.4       | 0.14 (-2.35, 2.70)    |
| <b>South-eastern Asia</b> | Male       | 16.6              | 13.7      | 11.6      | 13.6      | 12.8      | -0.82 (-2.05, 0.42)   |
|                           | Female     | 10.5              | 11.8      | 10.5      | 12.3      | 10.2      | -0.23 (-1.47, 1.02)   |
|                           | Both sexes | 13.6              | 12.8      | 11.0      | 13.0      | 11.6      | -0.56 (-1.49, 0.37)   |
| <b>Southern Asia</b>      | Male       | 9.1               | 12.5      | 9.6       | 11.2      | 5.2       | -2.47 (-6.25, 1.47)   |
|                           | Female     | 8.4               | 8.8       | 6.8       | 6.7       | 5.0       | -2.70 (-3.96, -1.42)  |
|                           | Both sexes | 8.7               | 10.7      | 8.2       | 9.1       | 5.1       | -2.54 (-5.28, 0.29)   |
| <b>Western Asia</b>       | Male       | 4.0               | 6.3       | 5.6       | 5.7       | 9.8       | 4.19 (1.15, 7.32)     |
|                           | Female     | 6.5               | 7.3       | 5.6       | 5.7       | 9.7       | 2.49 (-1.05, 6.15)    |
|                           | Both sexes | 5.2               | 6.8       | 5.6       | 5.7       | 9.7       | 3.31 (0.07, 6.67)     |
| <b>Eastern Europe</b>     | Male       | 5.7               | 5.8       | 6.5       | 9.3       | 8.4       | 2.37 (0.59, 4.18)     |
|                           | Female     | 6.1               | 3.9       | 5.5       | 9.1       | 6.4       | 1.54 (-2.18, 5.40)    |
|                           | Both sexes | 5.9               | 4.8       | 6.0       | 9.2       | 7.4       | 1.99 (-0.64, 4.69)    |

|                        |            |      |      |      |      |      |                      |
|------------------------|------------|------|------|------|------|------|----------------------|
| <b>Northern Europe</b> | Male       | 8.6  | 7.1  | 8.7  | 6.2  | 7.4  | -0.86 (-2.64, 0.95)  |
|                        | Female     | 8.9  | 9.4  | 7.8  | 7.8  | 5.8  | -2.01 (-3.25, -0.76) |
|                        | Both sexes | 8.8  | 8.2  | 8.3  | 7.0  | 6.6  | -1.44 (-2.01, -0.87) |
| <b>Southern Europe</b> | Male       | 6.3  | 7.3  | 7.4  | 6.9  | 7.7  | 0.60 (-0.28, 1.48)   |
|                        | Female     | 7.7  | 5.8  | 7.9  | 7.2  | 8.9  | 1.18 (-0.64, 3.04)   |
|                        | Both sexes | 7.0  | 6.6  | 7.6  | 7.0  | 8.3  | 0.89 (-0.08, 1.86)   |
| <b>Western Europe</b>  | Male       | 10.5 | 10.4 | 6.9  | 9.6  | 9.0  | -0.47 (-2.64, 1.74)  |
|                        | Female     | 11.0 | 8.7  | 6.5  | 6.6  | 7.7  | -1.62 (-3.75, 0.56)  |
|                        | Both sexes | 10.8 | 9.5  | 6.7  | 8.1  | 8.4  | -0.99 (-2.95, 1.01)  |
| <b>Oceania</b>         | Male       | 9.0  | 14.7 | 10.8 | 11.2 | 10.1 | -0.42 (-3.01, 2.24)  |
|                        | Female     | 7.6  | 9.3  | 9.6  | 7.1  | 11.9 | 1.46 (-1.08, 4.06)   |
|                        | Both sexes | 8.3  | 12.1 | 10.2 | 9.2  | 11.0 | 0.40 (-1.58, 2.41)   |

\* Rates were not calculated for time periods with less than five cases.

- Denotes time periods without data.

Supplementary Table 11: Incidence rates (per million) of kidney tumors by region, sex, and year of diagnosis

| Region                    | Sex        | Year of Diagnosis |           |           |           |           | AAPC<br>(95% CI)      |
|---------------------------|------------|-------------------|-----------|-----------|-----------|-----------|-----------------------|
|                           |            | 1988-1992         | 1993-1997 | 1998-2002 | 2003-2007 | 2008-2012 |                       |
| <b>Northern Africa</b>    | Male       | *                 | 15.5      | 11.9      | 14.9      | *         | 1.28 (-10.63, 14.78)  |
|                           | Female     | 12.3              | 14.0      | 18.8      | 12.3      | 10.9      | -1.35 (-5.10, 2.55)   |
|                           | Both sexes | 6.0               | 14.8      | 15.3      | 13.7      | 6.2       | -0.18 (-5.93, 5.92)   |
| <b>Sub-Saharan Africa</b> | Male       | 19.6              | 15.8      | 22.3      | 37.8      | 15.7      | 0.51 (-5.38, 6.76)    |
|                           | Female     | 23.7              | 15.6      | 15.6      | 23.1      | 23.6      | 1.29 (-1.34, 3.99)    |
|                           | Both sexes | 21.6              | 15.7      | 18.9      | 30.5      | 19.7      | 0.88 (-2.71, 4.62)    |
| <b>Caribbean</b>          | Male       | -                 | *         | 42.6      | 12.4      | 12.4      | -0.80 (-12.77, 12.81) |
|                           | Female     | -                 | 13.3      | *         | 20.6      | 15.8      | 1.67 (-3.08, 6.65)    |
|                           | Both sexes | -                 | 11.0      | 27.1      | 16.4      | 14.1      | 0.48 (-5.68, 7.05)    |
| <b>Central America</b>    | Male       | 6.0               | 12.1      | 7.9       | 10.6      | 6.9       | 0.96 (-2.83, 4.89)    |
|                           | Female     | 10.4              | 15.2      | 7.2       | 12.2      | 16.0      | 1.66 (-2.33, 5.82)    |
|                           | Both sexes | 8.2               | 13.6      | 7.6       | 11.4      | 11.3      | 1.36 (-1.66, 4.47)    |
| <b>South America</b>      | Male       | 11.0              | 13.9      | 16.2      | 16.2      | 15.5      | 2.90 (-3.94, 10.22)   |
|                           | Female     | 10.9              | 18.6      | 21.4      | 14.9      | 18.1      | 0.90 (-2.29, 4.20)    |
|                           | Both sexes | 10.9              | 16.2      | 18.8      | 15.6      | 16.8      | 1.06 (-1.11, 3.28)    |
| <b>North America</b>      | Male       | 20.2              | 20.5      | 18.0      | 17.0      | 17.7      | -0.88 (-1.53, -0.22)  |
|                           | Female     | 20.8              | 22.3      | 19.4      | 18.2      | 20.0      | -0.51 (-1.45, 0.43)   |
|                           | Both sexes | 20.5              | 21.4      | 18.7      | 17.6      | 18.8      | -0.69 (-1.49, 0.11)   |
| <b>Eastern Asia</b>       | Male       | 9.1               | 8.7       | 10.3      | 10.0      | 11.0      | 1.10 (0.40, 1.80)     |
|                           | Female     | 8.5               | 8.6       | 10.2      | 10.9      | 9.6       | 0.71 (-0.52, 1.97)    |
|                           | Both sexes | 8.8               | 8.7       | 10.3      | 10.4      | 10.3      | 0.91 (0.18, 1.65)     |
| <b>South-eastern Asia</b> | Male       | 8.8               | 7.7       | 8.9       | 10.8      | 10.4      | 1.60 (0.36, 2.86)     |
|                           | Female     | 9.4               | 7.8       | 9.9       | 5.7       | 11.3      | 0.93 (-3.02, 5.03)    |
|                           | Both sexes | 9.1               | 7.7       | 9.4       | 8.3       | 10.8      | 1.29 (-0.34, 2.94)    |
| <b>Southern Asia</b>      | Male       | 8.6               | 10.6      | 12.6      | 10.2      | 7.6       | -1.00 (-3.68, 1.75)   |
|                           | Female     | 7.5               | 8.5       | 8.6       | 7.7       | 8.1       | -0.11 (-0.96, 0.75)   |
|                           | Both sexes | 8.1               | 9.6       | 10.7      | 9.0       | 7.8       | -0.60 (-2.36, 1.19)   |
| <b>Western Asia</b>       | Male       | 8.5               | 10.1      | 13.7      | 15.0      | 15.3      | 2.52 (1.23, 3.83)     |
|                           | Female     | 8.3               | 12.0      | 16.2      | 15.1      | 14.9      | 1.61 (-0.54, 3.80)    |
|                           | Both sexes | 8.4               | 11.1      | 14.9      | 15.0      | 15.1      | -1.09 (-5.85, 3.90)   |
| <b>Eastern Europe</b>     | Male       | 17.7              | 15.4      | 14.6      | 18.3      | 19.0      | 0.76 (-0.41, 1.95)    |
|                           | Female     | 19.4              | 14.2      | 16.5      | 23.0      | 22.2      | 1.52 (-0.42, 3.50)    |
|                           | Both sexes | 18.5              | 14.8      | 15.5      | 20.6      | 20.5      | 1.15 (-0.36, 2.68)    |

|                        |            |      |      |      |      |      |                     |
|------------------------|------------|------|------|------|------|------|---------------------|
| <b>Northern Europe</b> | Male       | 18.1 | 17.6 | 17.9 | 18.3 | 17.4 | -0.07 (-0.35, 0.21) |
|                        | Female     | 19.9 | 17.1 | 19.6 | 21.2 | 19.0 | 0.34 (-0.81, 1.50)  |
|                        | Both sexes | 19.0 | 17.3 | 18.7 | 19.7 | 18.2 | 0.14 (-0.58, 0.85)  |
| <b>Southern Europe</b> | Male       | 15.6 | 15.2 | 17.3 | 18.3 | 15.3 | 0.19 (-1.09, 1.49)  |
|                        | Female     | 19.1 | 16.4 | 20.8 | 17.6 | 16.5 | -0.55 (-2.00, 0.91) |
|                        | Both sexes | 17.3 | 15.8 | 19.0 | 18.0 | 15.9 | -0.19 (-1.40, 1.03) |
| <b>Western Europe</b>  | Male       | 17.3 | 20.3 | 16.0 | 20.5 | 17.2 | -0.06 (-1.64, 1.54) |
|                        | Female     | 17.2 | 23.5 | 18.9 | 20.8 | 22.1 | 0.74 (-0.58, 2.07)  |
|                        | Both sexes | 17.2 | 21.9 | 17.5 | 20.7 | 19.6 | 0.35 (-0.92, 1.64)  |
| <b>Oceania</b>         | Male       | 14.4 | 20.1 | 16.0 | 16.7 | 17.2 | 0.16 (-1.55, 1.90)  |
|                        | Female     | 23.7 | 19.4 | 22.3 | 19.5 | 19.3 | -0.79 (-1.78, 0.22) |
|                        | Both sexes | 18.9 | 19.8 | 19.1 | 18.1 | 18.2 | -0.35 (-0.71, 0.02) |

\* Rates were not calculated for time periods with less than five cases.

- Denotes time periods without data.



Supplementary Table 12: Incidence rates (per million) of hepatoblastoma by region, sex, and year of diagnosis

| Region                    | Sex        | Year of Diagnosis |           |           |           |           | AAPC<br>(95% CI)      |
|---------------------------|------------|-------------------|-----------|-----------|-----------|-----------|-----------------------|
|                           |            | 1988-1992         | 1993-1997 | 1998-2002 | 2003-2007 | 2008-2012 |                       |
| <b>Northern Africa</b>    | Male       | *                 | *         | *         | *         | *         | -1.74 (-17.19, 16.60) |
|                           | Female     | *                 | *         | *         | 2.4       | *         | 6.40 (-12.16, 28.88)  |
|                           | Both sexes | *                 | *         | *         | 2.1       | *         | 1.93 (-12.49, 18.71)  |
| <b>Sub-Saharan Africa</b> | Male       | *                 | *         | *         | *         | *         | -1.95 (-23.44, 25.59) |
|                           | Female     | *                 | *         | *         | *         | *         | 16.96 (-3.98, 42.45)  |
|                           | Both sexes | *                 | *         | *         | *         | *         | 4.85 (-11.00, 23.53)  |
| <b>Caribbean</b>          | Male       | -                 | *         | *         | *         | *         | 11.45 (-10.74, 39.16) |
|                           | Female     | -                 | *         | *         | *         | *         | 3.19 (-28.15, 48.21)  |
|                           | Both sexes | -                 | *         | *         | 4.2       | *         | 7.66 (-17.37, 40.27)  |
| <b>Central America</b>    | Male       | *                 | *         | *         | 6.4       | 11.1      | 24.82 (12.88, 38.01)  |
|                           | Female     | *                 | *         | *         | *         | *         | 4.81 (-3.02, 13.27)   |
|                           | Both sexes | *                 | *         | *         | 4.3       | 7.8       | 14.25 (6.40, 22.68)   |
| <b>South America</b>      | Male       | *                 | 3.5       | 2.7       | 4.6       | 3.4       | 4.34 (-2.33, 11.47)   |
|                           | Female     | *                 | *         | 2.1       | 2.0       | 3.7       | 7.53 (3.97, 11.21)    |
|                           | Both sexes | *                 | 2.1       | 2.4       | 3.3       | 3.5       | 5.55 (2.16, 9.06)     |
| <b>North America</b>      | Male       | 4.7               | 5.7       | 6.1       | 7.2       | 8.8       | 3.12 (2.50, 3.74)     |
|                           | Female     | 3.3               | 3.4       | 4.8       | 4.5       | 4.8       | 1.68 (0.26, 3.12)     |
|                           | Both sexes | 4.1               | 4.6       | 5.4       | 5.9       | 6.8       | 2.56 (2.23, 2.90)     |
| <b>Eastern Asia</b>       | Male       | 4.2               | 3.4       | 5.6       | 5.6       | 7.6       | 3.88 (1.92, 5.89)     |
|                           | Female     | 3.5               | 4.2       | 5.3       | 4.0       | 6.8       | 2.87 (0.07, 5.75)     |
|                           | Both sexes | 3.8               | 3.9       | 5.5       | 4.8       | 7.2       | 3.63 (1.48, 5.84)     |
| <b>South-eastern Asia</b> | Male       | 2.1               | 1.9       | 3.8       | 4.1       | 4.2       | 4.37 (1.68, 7.12)     |
|                           | Female     | 2.2               | 1.1       | 2.6       | 3.2       | 5.0       | 7.17 (2.81, 11.70)    |
|                           | Both sexes | 2.2               | 1.5       | 3.2       | 3.6       | 4.6       | 4.90 (3.13, 6.71)     |
| <b>Southern Asia</b>      | Male       | 3.6               | 2.3       | 1.9       | 10.2      | 2.3       | -1.67 (-4.25, 0.98)   |
|                           | Female     | 2.6               | 1.9       | 1.6       | 7.7       | 1.3       | -3.11 (-4.28, -1.94)  |
|                           | Both sexes | 3.1               | 2.1       | 1.7       | 9.0       | 1.8       | -2.23 (-4.22, -0.20)  |
| <b>Western Asia</b>       | Male       | *                 | 2.8       | 3.9       | 3.6       | 3.6       | 1.53 (-0.38, 3.47)    |
|                           | Female     | *                 | *         | 2.7       | 2.1       | 4.0       | 4.86 (0.09, 9.86)     |
|                           | Both sexes | 2.3               | 2.0       | 3.3       | 2.9       | 3.8       | 2.90 (0.76, 5.09)     |
| <b>Eastern Europe</b>     | Male       | 1.9               | 1.9       | 2.5       | 3.5       | 6.0       | 6.97 (4.66, 9.33)     |
|                           | Female     | 0.9               | 1.4       | 2.4       | 2.8       | 3.3       | 5.80 (3.83, 7.81)     |
|                           | Both sexes | 1.4               | 1.7       | 2.5       | 3.2       | 4.7       | 6.51 (5.69, 7.34)     |

|                        |            |     |     |     |     |     |                     |
|------------------------|------------|-----|-----|-----|-----|-----|---------------------|
| <b>Northern Europe</b> | Male       | 2.7 | 3.1 | 4.0 | 4.7 | 5.2 | 3.46 (2.71, 4.22)   |
|                        | Female     | 2.2 | 1.7 | 2.7 | 3.6 | 3.8 | 4.02 (1.53, 6.57)   |
|                        | Both sexes | 2.5 | 2.4 | 3.4 | 3.8 | 4.5 | 3.82 (1.62, 6.07)   |
| <b>Southern Europe</b> | Male       | 3.8 | 1.8 | 4.0 | 3.9 | 5.4 | 3.10 (-0.67, 7.02)  |
|                        | Female     | 2.6 | 1.3 | 1.7 | 3.1 | 4.0 | 4.49 (-0.16, 9.36)  |
|                        | Both sexes | 3.2 | 1.6 | 2.9 | 3.5 | 4.7 | 3.63 (-0.07, 7.47)  |
| <b>Western Europe</b>  | Male       | 3.2 | 2.5 | 3.6 | 4.7 | 6.0 | 4.30 (2.59, 6.04)   |
|                        | Female     | 1.5 | 2.9 | 3.2 | 2.6 | 3.1 | 1.87 (-0.80, 4.60)  |
|                        | Both sexes | 2.4 | 2.7 | 3.4 | 3.7 | 4.6 | 3.33 (2.57, 4.10)   |
| <b>Oceania</b>         | Male       | *   | 5.4 | 5.2 | 4.2 | 6.2 | 3.73 (-1.59, 9.33)  |
|                        | Female     | *   | 4.7 | 3.1 | 3.7 | 4.9 | 4.19 (-2.24, 11.04) |
|                        | Both sexes | 0.9 | 5.0 | 4.2 | 4.0 | 5.5 | 3.92 (-1.75, 9.92)  |

\* Rates were not calculated for time periods with less than five cases.

- Denotes time periods without data.

Supplementary Table 13: Incidence rates (per million) of testicular germ cell tumors by region, sex, and year of diagnosis

| Region                    | Year of Diagnosis |           |           |           |           | AAPC<br>(95% CI)      |
|---------------------------|-------------------|-----------|-----------|-----------|-----------|-----------------------|
|                           | 1988-1992         | 1993-1997 | 1998-2002 | 2003-2007 | 2008-2012 |                       |
| <b>Northern Africa</b>    | *                 | *         | 4.5       | *         | *         | 0.41 (-17.91, 22.83)  |
| <b>Sub-Saharan Africa</b> | *                 | *         | *         | *         | *         | -0.74 (-10.66, 10.27) |
| <b>Caribbean</b>          | -                 | *         | *         | *         | *         | -7.05 (-18.11, 5.49)  |
| <b>Central America</b>    | 9.0               | *         | 4.9       | 5.3       | 8.3       | -1.02 (-5.08, 3.21)   |
| <b>South America</b>      | 8.7               | 5.6       | 4.0       | 10.3      | 10.9      | 3.19 (-2.11, 8.77)    |
| <b>North America</b>      | 4.5               | 5.3       | 4.7       | 4.0       | 5.7       | 0.54 (-1.67, 2.81)    |
| <b>Eastern Asia</b>       | 11.7              | 10.4      | 10.6      | 8.7       | 9.3       | -1.18 (-2.06, -0.30)  |
| <b>South-eastern Asia</b> | 8.5               | 5.2       | 7.8       | 7.8       | 6.7       | 0.32 (-2.35, 3.06)    |
| <b>Southern Asia</b>      | 4.0               | 4.6       | 3.9       | 4.0       | 1.8       | -3.11 (-6.46, 0.35)   |
| <b>Western Asia</b>       | *                 | 3.5       | 3.9       | 4.2       | 5.3       | 3.84 (2.03, 5.69)     |
| <b>Eastern Europe</b>     | 3.4               | 2.5       | 4.8       | 3.0       | 5.7       | 3.02 (-0.98, 7.19)    |
| <b>Northern Europe</b>    | 7.3               | 5.3       | 4.7       | 3.9       | 3.6       | -3.44 (-4.40, -2.46)  |
| <b>Southern Europe</b>    | 4.2               | 3.7       | 4.8       | 3.0       | 3.9       | -0.70 (-3.38, 2.05)   |
| <b>Western Europe</b>     | 7.0               | 5.5       | 5.0       | 3.8       | 3.4       | -3.47 (-4.01, -2.93)  |
| <b>Oceania</b>            | 6.6               | 9.1       | 7.4       | 6.2       | 4.4       | -2.38 (-4.98, 0.30)   |

\* Rates were not calculated for time periods with less than five cases.

- Denotes time periods without data.
